# Supplementary material
Source: PubMed Central journal article supplement (PMC3158818)
Supplement: NIHMS301939-supplement-1.pdf [file NIHMS301939-supplement-1.pdf]

**Tuberous sclerosis complex 1 (Tsc1) enforces quiescence of naive T cells to  
promote immune homeostasis and function**

Kai Yang<sup>1</sup>, Geoffrey Neale<sup>2</sup>, Douglas R. Green<sup>1</sup>, Weifeng He<sup>1</sup> and Hongbo Chi<sup>1</sup>

<sup>1</sup>Department of Immunology and <sup>2</sup>Hartwell Center for Bioinformatics and Biotechnology, St. Jude Children's Research Hospital, Memphis, Tennessee 38105, USA.

Correspondence should be addressed to:

**Hongbo Chi**, Department of Immunology, St. Jude Children's Research Hospital, Memphis, TN 38105, USA. Phone: 901-595-6282; Fax: 901-595-5766; E-mail:

[hongbo.chi@stjude.org](mailto:hongbo.chi@stjude.org).

## Supplementary Figure 1

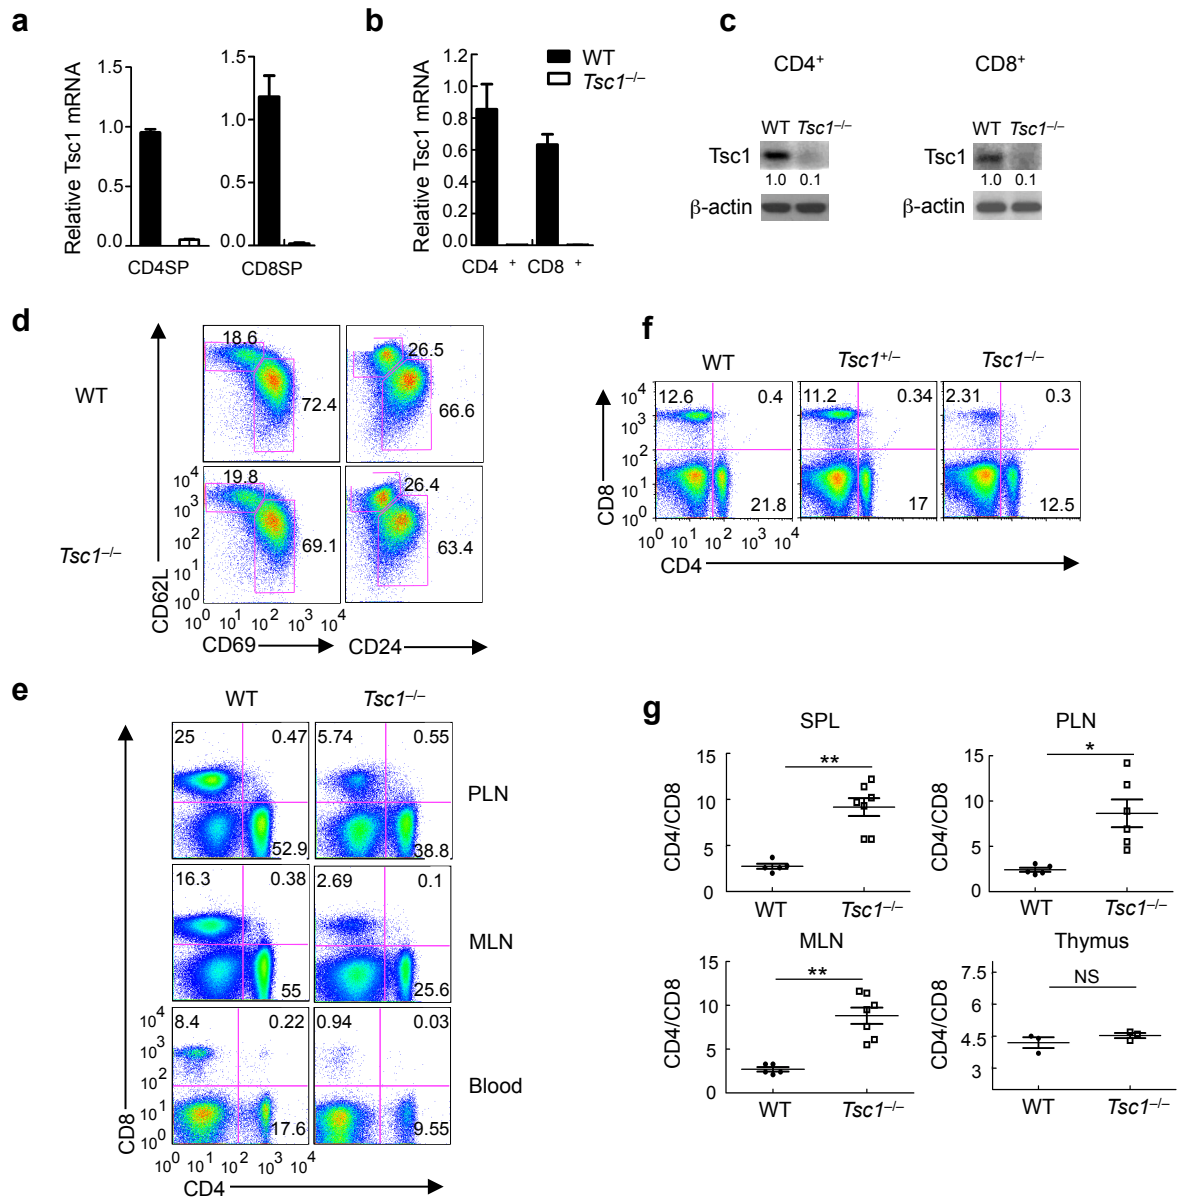

**Supplementary Figure 1. T cell-specific deletion of *Tsc1* results in altered homeostasis of peripheral but not thymic T cells.** (a,b) Analysis of *Tsc1* mRNA expression in CD4SP and CD8SP thymocytes (a) and in peripheral CD4 and CD8 T cells (b). (c) Western blot of *Tsc1* expression in peripheral CD4 and CD8 T cells. Numbers below lanes indicate band intensity relative to that of the loading control  $\beta$ -actin. (d) Normal expression of maturation markers on *Tsc1*<sup>-/-</sup> CD4SP thymocytes. (e) Reduced CD4 and CD8 populations in peripheral lymph nodes (PLN), mesenteric lymph nodes (MLN) and blood of *Tsc1*<sup>-/-</sup> mice. (f) Normal distribution of CD4 and CD8 populations in the spleen of *Tsc1*<sup>+/-</sup> mice. (g) Increased ratios of CD4 vs CD8 T cells in the peripheral but not thymic T cells from *Tsc1*<sup>-/-</sup> mice (n=3-7). SPL, spleen. \*  $P < 0.01$ ; \*\*  $P < 0.001$ ; NS, not significant. Data are representative of 3-4 independent experiments.

## Supplementary Figure 2

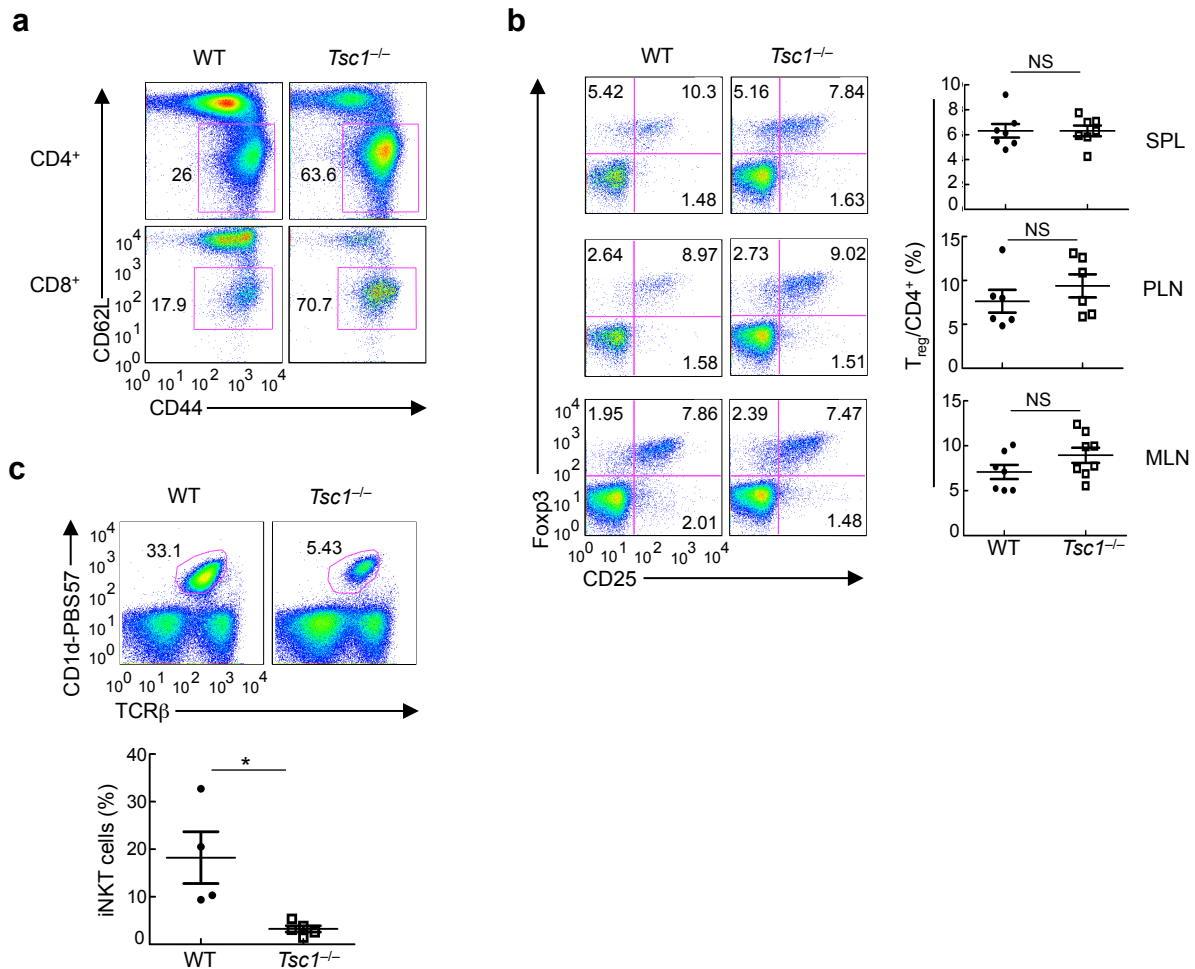

**Supplementary Figure 2. Analysis of T cell subsets in the periphery of *Tsc1*<sup>-/-</sup> mice. (a)** Flow cytometry of CD62L and CD44 expression in mice at 8 months of age showed expansion of the CD62L<sup>lo</sup>CD44<sup>hi</sup> population in *Tsc1*<sup>-/-</sup> cells. **(b)** Flow cytometry of Foxp3 and CD25 expression revealed normal frequency of T<sub>reg</sub> cells in the periphery of *Tsc1*<sup>-/-</sup> mice (n=6-8). **(c)** Flow cytometry analysis of iNKT cells (TCR $\beta$ <sup>+</sup>CD1d-PBS57<sup>+</sup>) in the livers of WT and *Tsc1*<sup>-/-</sup> mice (n=4-5). \* *P*<0.05; NS, not significant. Data are representative of 4 independent experiments.

### Supplementary Figure 3

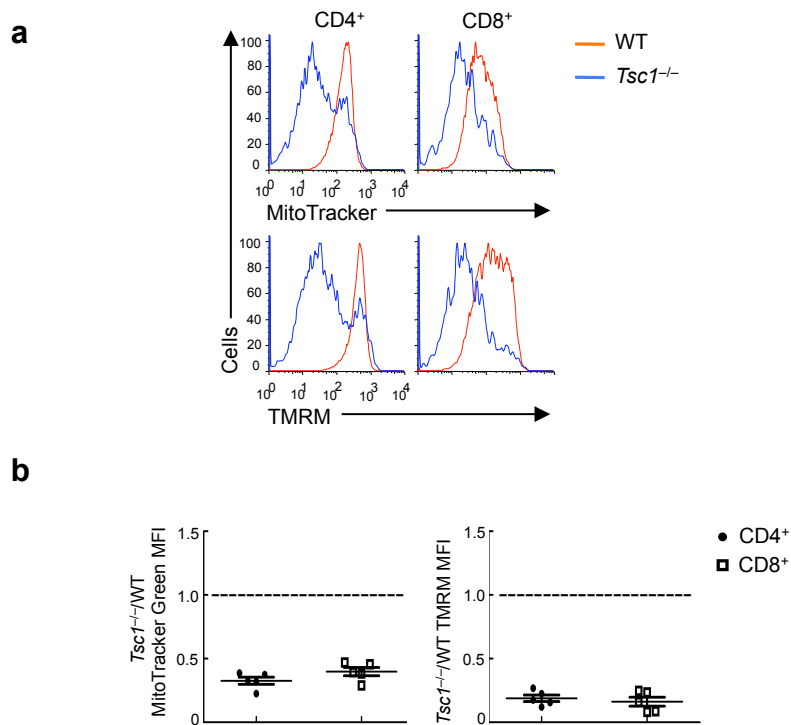

**Supplementary Figure 3. Altered mitochondrial homeostasis in *Tsc1*<sup>-/-</sup> T cells.** (a) CD4 and CD8 T cells from WT and *Tsc1*<sup>-/-</sup> mice were stained with MitoTracker Green and TMRM and analyzed by flow cytometry. (b) Ratios of *Tsc1*<sup>-/-</sup>/WT for the mean fluorescent intensity (MFI) of MitoTracker Green and TMRM staining (n=5). Data are representative of 4 independent experiments.

## Supplementary Figure 4

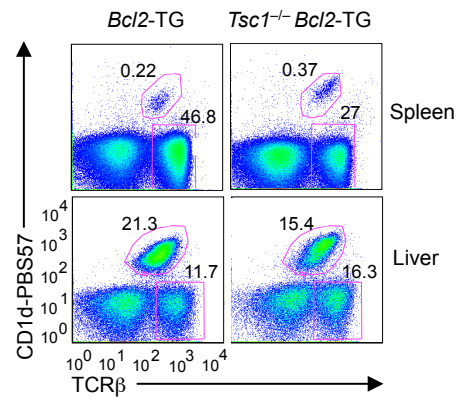

**Supplementary Figure 4. The *Bcl2* transgene rescues the diminished iNKT cells in *Tsc1*<sup>-/-</sup> mice.** Flow cytometry of iNKT cells (TCRβ<sup>+</sup>CD1d-PBS57<sup>+</sup>) in the spleens and livers of *Bcl2*-TG and *Tsc1*<sup>-/-</sup> *Bcl2*-TG mice. Data are representative of 3 independent experiments.

## Supplementary Figure 5

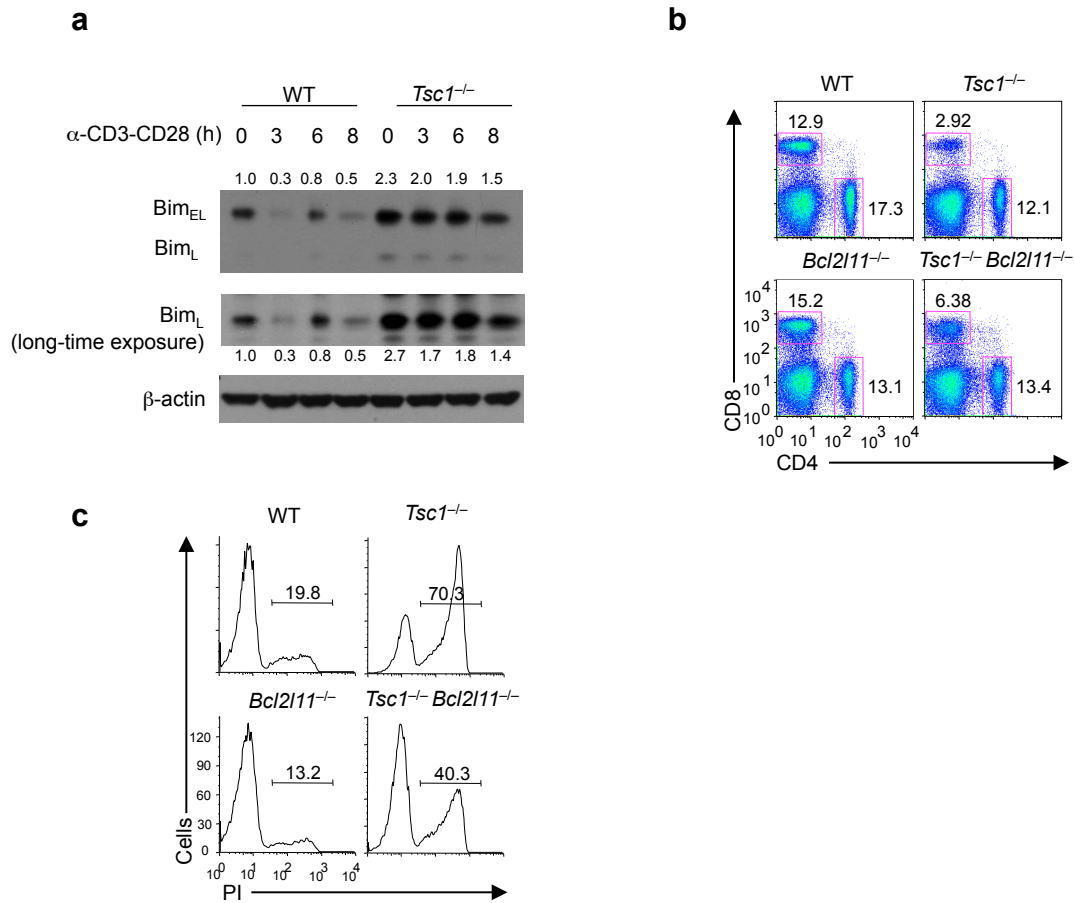

**Supplementary Figure 5. Role of Bim in apoptosis of *Tsc1*-deficient T cells.** (a) Western blot of Bim<sub>EL</sub> and Bim<sub>L</sub> expression in WT and *Tsc1*<sup>-/-</sup> CD8 T cells. A long-time exposure was shown in the middle panel to highlight Bim<sub>L</sub> levels. Numbers above (Bim<sub>EL</sub>) and below (Bim<sub>L</sub>) lanes indicate band intensity relative to that of the loading control  $\beta$ -actin. (b) Flow cytometry of CD4 and CD8 T cells in the spleens of WT, *Tsc1*<sup>-/-</sup>, *Bcl2/11*<sup>-/-</sup>, and *Tsc1*<sup>-/-</sup> *Bcl2/11*<sup>-/-</sup> mice. (c) Flow cytometry detection of PI<sup>+</sup> apoptotic cells after 16 hours of stimulation of CD4 T cells with anti-CD3-CD28. Data are representative of 2 independent experiments.

## Supplementary Figure 6

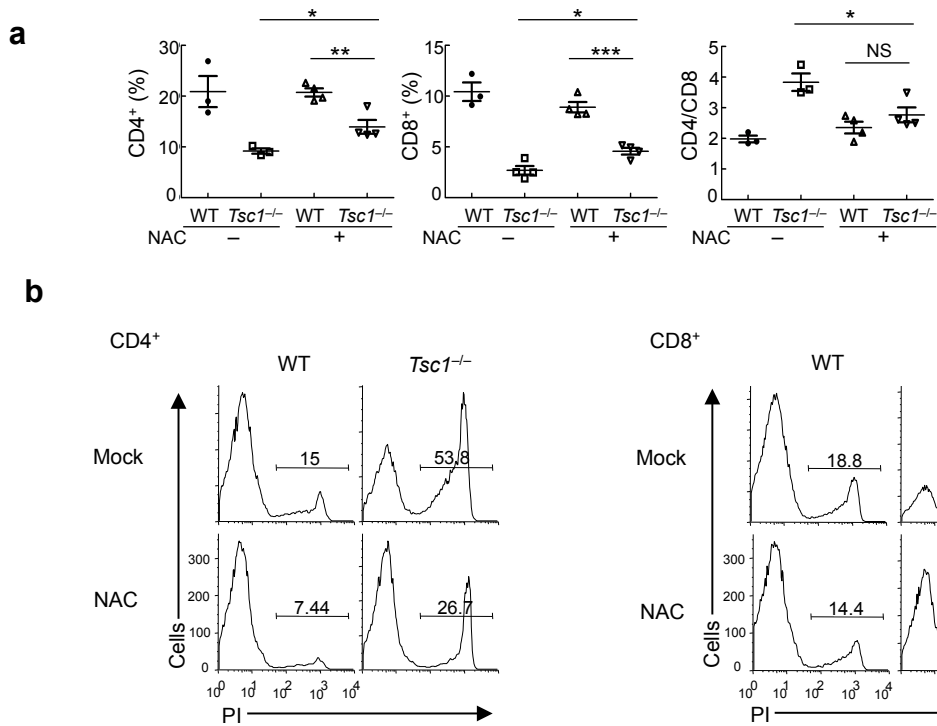

**Supplementary Figure 6. NAC treatment partially rescues the increased apoptosis of *Tsc1*<sup>-/-</sup> T cells.** (a) WT and *Tsc1*<sup>-/-</sup> mice were treated with NAC or mock for 5 weeks, followed by flow cytometry of CD4 and CD8 T cells in the spleens (n=3-4). \*  $P < 0.05$ ; \*\*  $P < 0.005$ ; \*\*\*  $P < 0.0005$ ; NS, not significant. (b) Naïve CD4 (left) and CD8 (right) T cells were purified from these mice and stimulated with anti-CD3-CD28 for 16 hours, followed by flow cytometry of PI<sup>+</sup> apoptotic cells. Data are representative of 2 independent experiments.

## Supplementary Figure 7

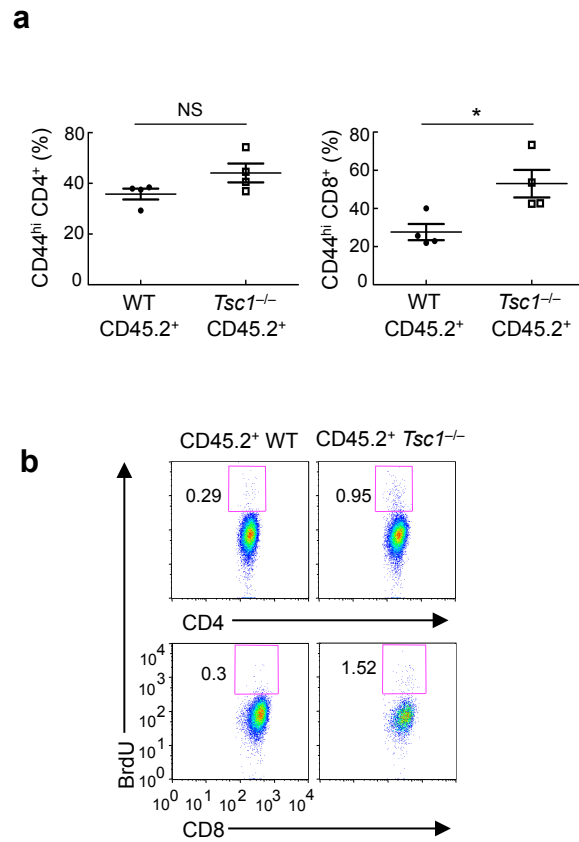

**Supplementary Figure 7. Analysis of T cell homeostasis and *in vivo* cycling in mixed bone marrow chimeras. (a)** Proportions of CD44<sup>hi</sup> populations in CD45.2<sup>+</sup> donor-derived CD4 (left) and CD8 (right) cells in the spleens of mixed bone marrow chimeras. \*  $P < 0.05$ ; NS, not significant. **(b)** BrdU staining in CD45.2<sup>+</sup> donor-derived naïve cells in the mixed bone marrow chimeras 16 hours after injection with BrdU. Data are representative of 2 independent experiments.



## Supplementary Figure 8

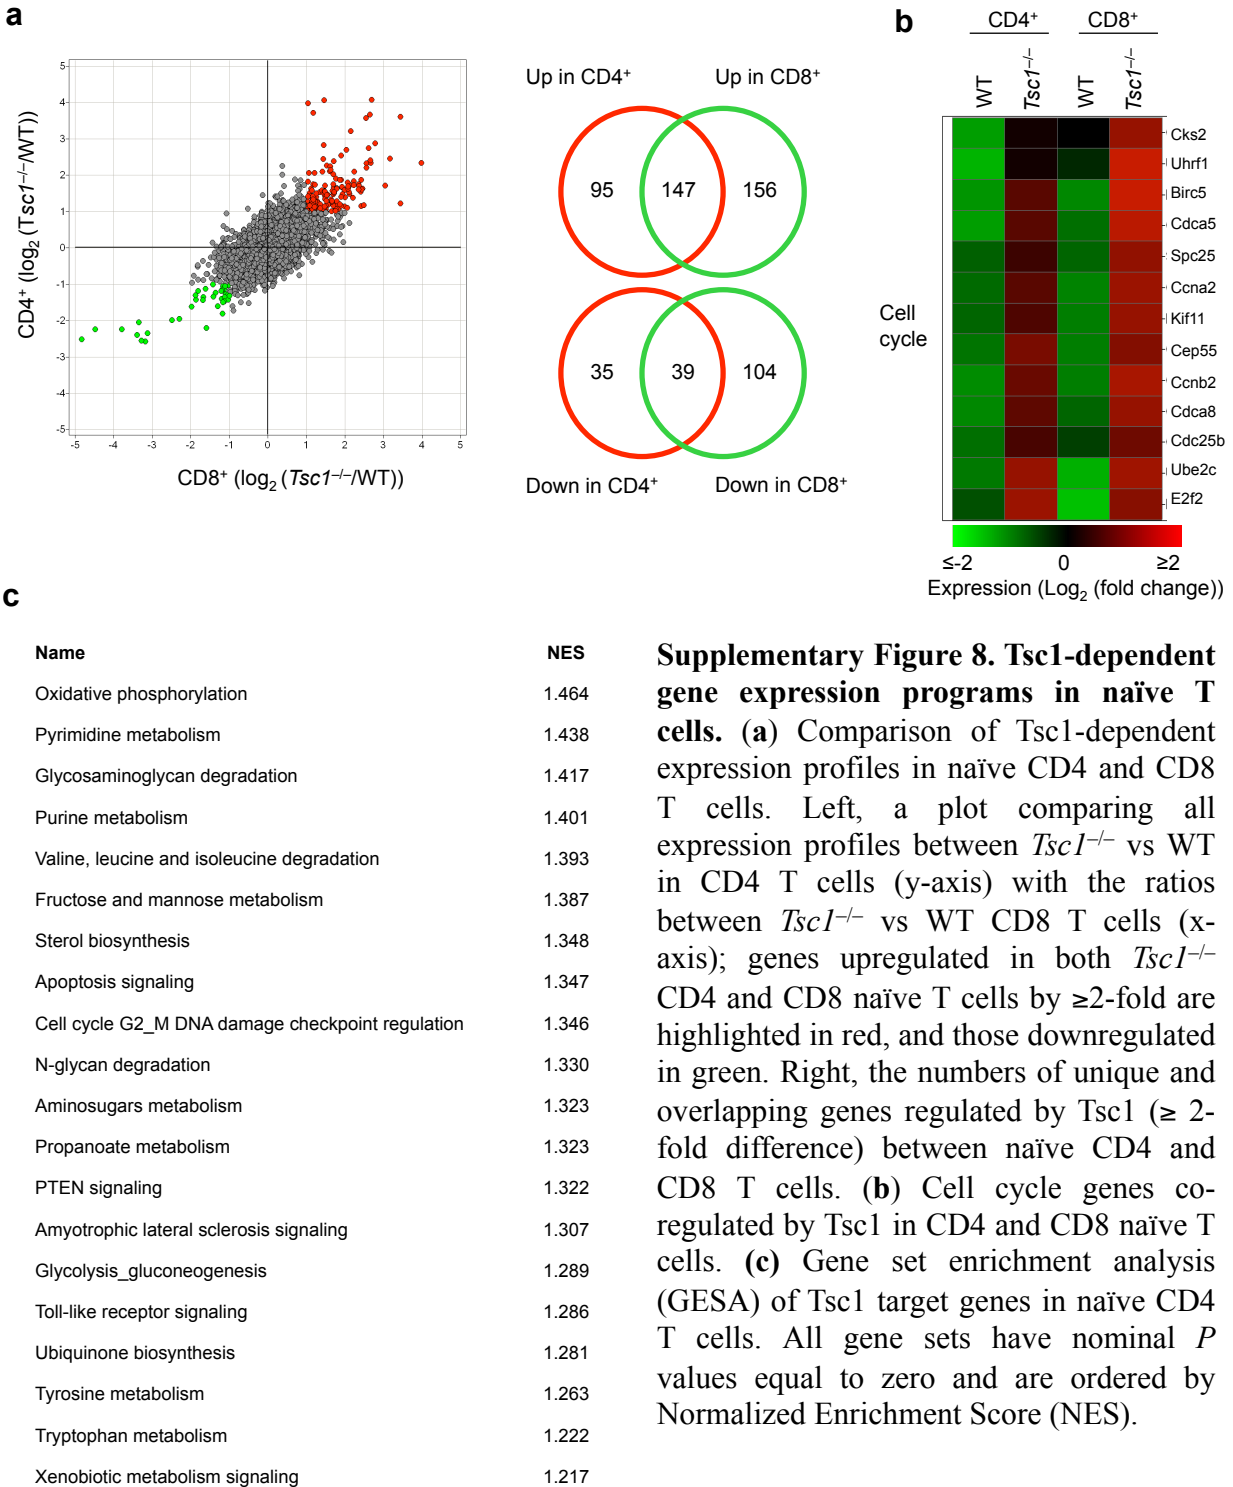

## Supplementary Figure 9

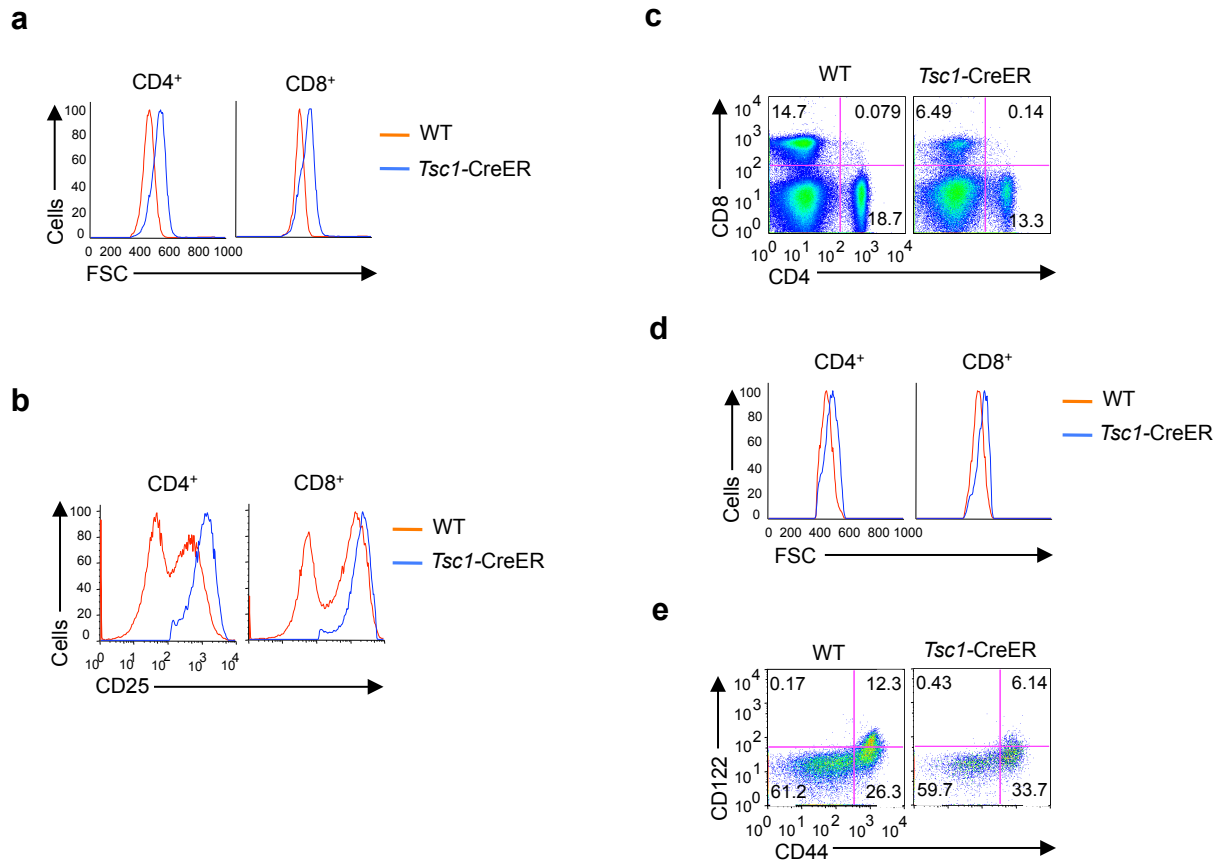

**Supplementary Figure 9. Effects of inducible deletion of *Tsc1* on T cell quiescence and homeostasis.** (a,b) WT and *Tsc1*-CreER mice were treated with tamoxifen, and 2 weeks later, naïve T cells were purified and stimulated with anti-CD3-CD28 for 16 hours. Cell size (a) and expression of activation marker CD25 (b) in stimulated cells were examined by flow cytometry. (c-e) WT and *Tsc1*-CreER mice were treated with tamoxifen, and analyzed 5 weeks later for the peripheral T cell populations (c), cell size (d), and distribution of CD44<sup>hi</sup>CD122<sup>+</sup> and CD44<sup>hi</sup>CD122<sup>-</sup> populations (e). Data are representative of 2 independent experiments.

## Supplementary Figure 10

**a**

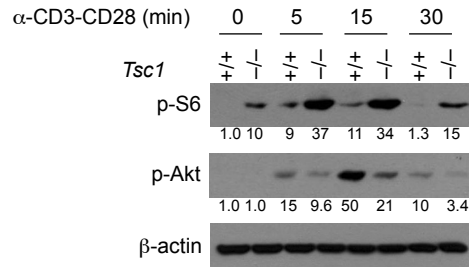

**b**

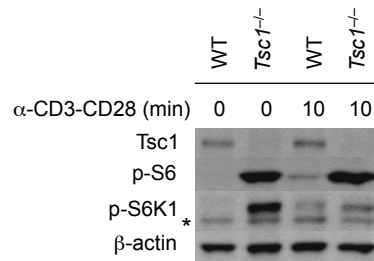

**Supplementary Figure 10. *Tsc1* regulates mTOR signaling in CD8 T cells and mature thymocytes. (a)** Western blot of S6 and Akt (Ser473) phosphorylation in WT and *Tsc1*<sup>-/-</sup> naïve CD8 T cells before and after anti-CD3-CD28 stimulation. Numbers below lanes indicate band intensity relative to that of the loading control  $\beta$ -actin. **(b)** Western blot of S6 and S6K1 phosphorylation in WT and *Tsc1*<sup>-/-</sup> CD4SP thymocytes before and after anti-CD3-CD28 stimulation. \*, non-specific bands. Data are representative of 2-3 independent experiments.

## Supplementary Figure 11

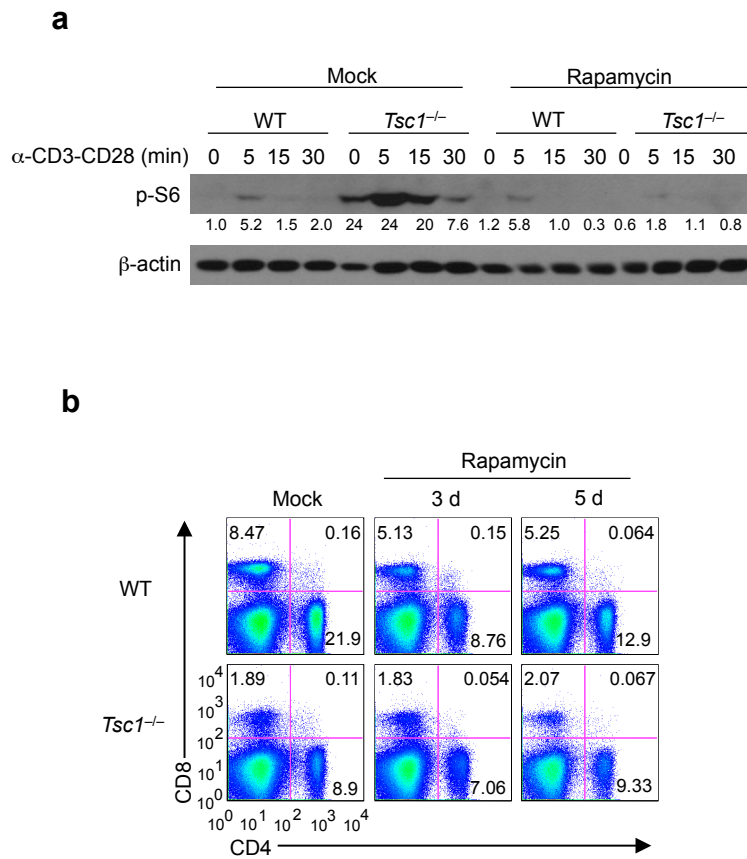

**Supplementary Figure 11. Effects of short-term rapamycin treatment on *Tsc1<sup>-/-</sup>* T cells.** (a) Sorted naïve T cells from WT and *Tsc1<sup>-/-</sup>* mice following rapamycin or mock treatment were activated with anti-CD3-CD28 for various times, and phosphorylation of S6 was examined by Western blots. Numbers below lanes indicate band intensity relative to that of the loading control  $\beta$ -actin. (b) Flow cytometry of CD4 and CD8 T cells in the spleens of rapamycin or mock treated WT and *Tsc1<sup>-/-</sup>* mice. Data are representative of 2-3 independent experiments.

## Supplementary Figure 12

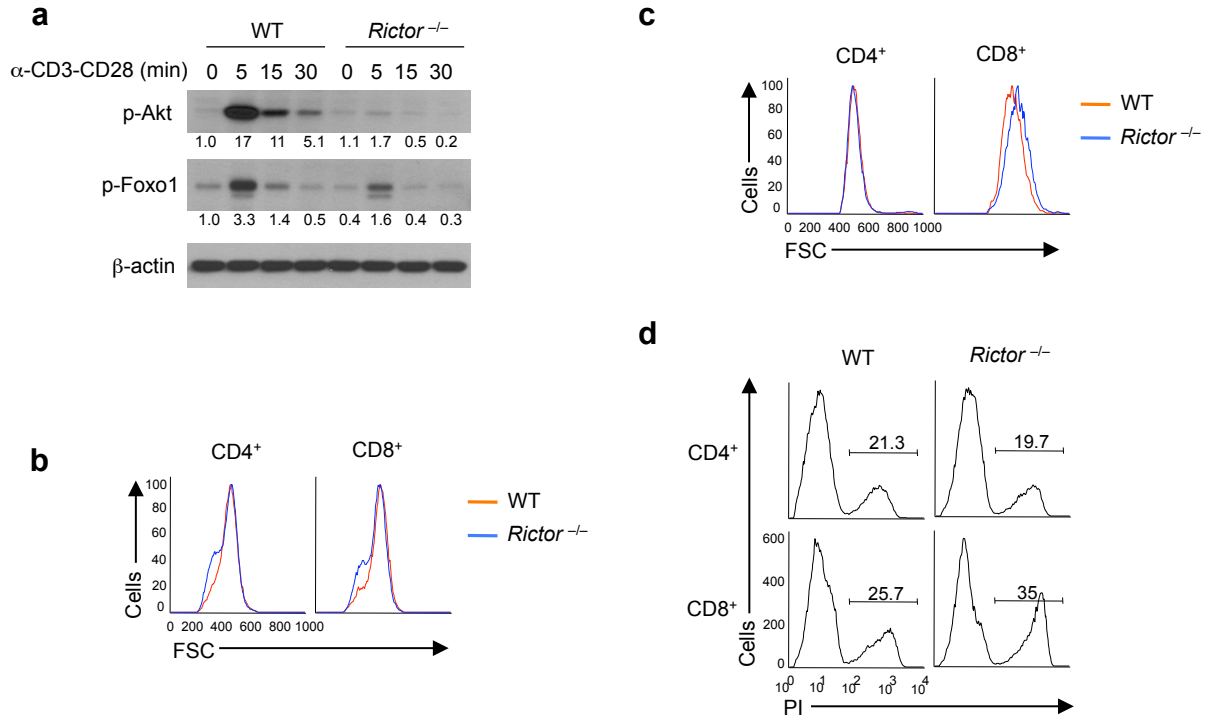

**Supplementary Figure 12. Analysis of homeostasis and activation of *Rictor*<sup>-/-</sup> T cells.** (a) Western blot of Akt (Ser473) and Foxo1 phosphorylation in WT and *Rictor*<sup>-/-</sup> naïve T cells before and after anti-CD3-CD28 stimulation. Numbers below lanes indicate band intensity relative to that of the loading control  $\beta$ -actin. (b) Flow cytometry of cell size for WT and *Rictor*<sup>-/-</sup> splenocytes. (c,d) Sorted naïve T cells from WT and *Rictor*<sup>-/-</sup> mice were activated with anti-CD3-CD28 for 16 hours, followed by measurements of cell size (c) and PI<sup>+</sup> apoptotic cells (d). Data are representative of 2-3 independent experiments.

## Supplementary Figure 13

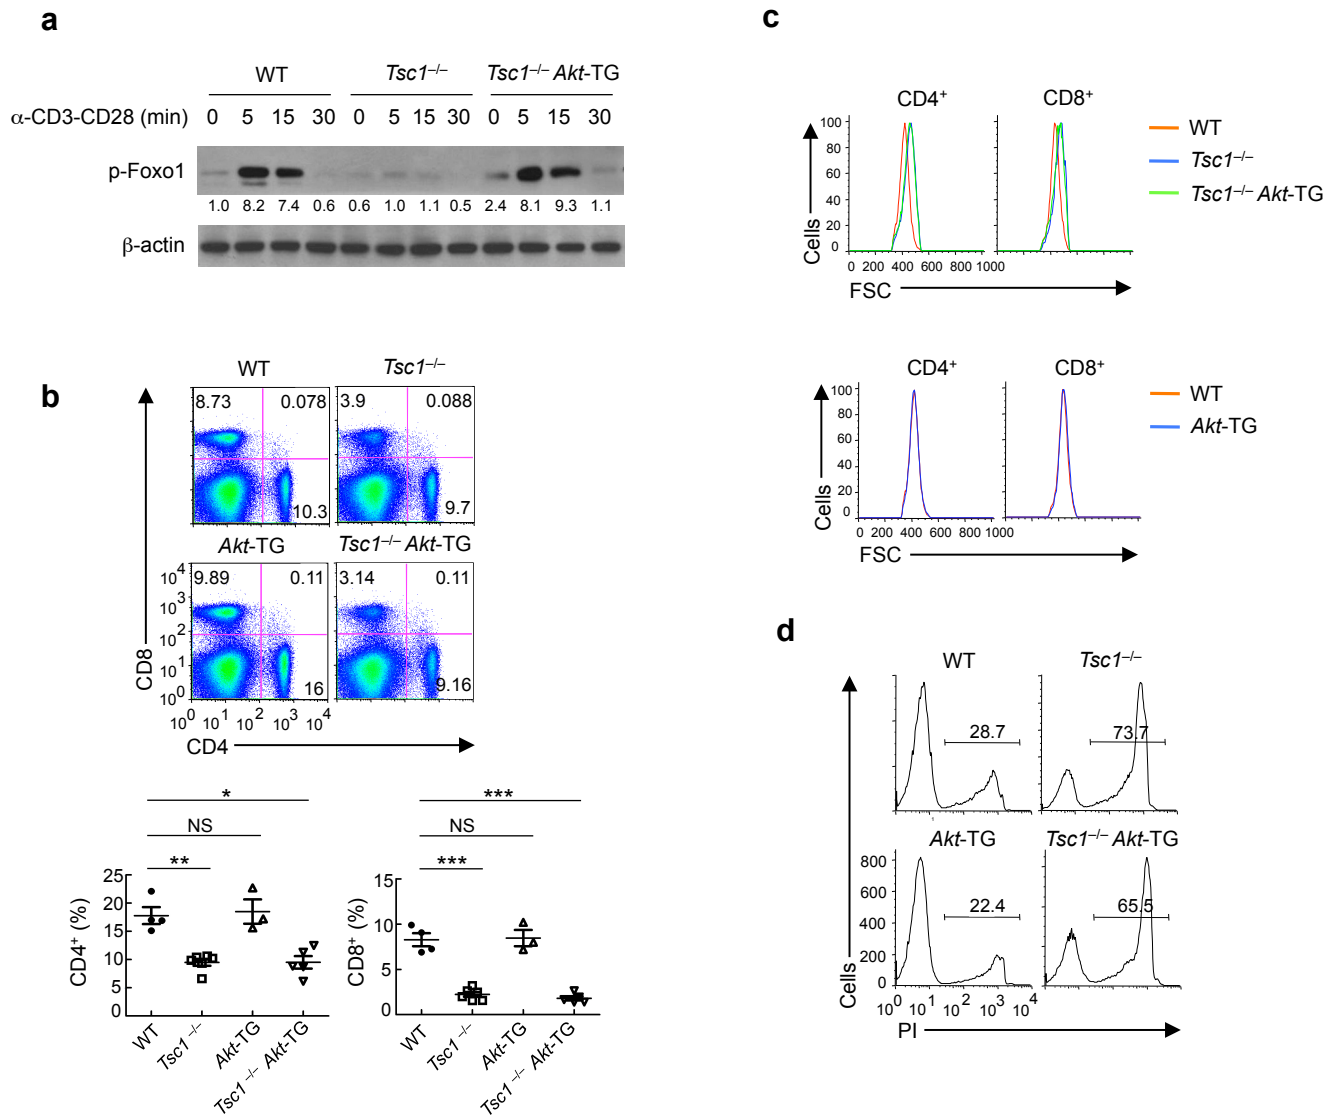

**Supplementary Figure 13. The *Akt*-transgene fails to rectify the defective homeostasis and activation of *Tsc1*<sup>-/-</sup> T cells.** (a) Western blot analysis of Foxo1 phosphorylation in WT, *Tsc1*<sup>-/-</sup>, *Akt*-TG, and *Tsc1*<sup>-/-</sup> *Akt*-TG naïve T cells before and after anti-CD3-CD28 stimulation. Numbers below lanes indicate band intensity relative to that of the loading control  $\beta$ -actin. (b) Flow cytometry of CD4 and CD8 T cells in the spleens of WT, *Tsc1*<sup>-/-</sup>, *Akt*-TG, and *Tsc1*<sup>-/-</sup> *Akt*-TG mice. Lower panels, proportions and absolute numbers of CD4<sup>+</sup> and CD8<sup>+</sup> T cells in the spleens of WT and *Tsc1*<sup>-/-</sup> mice (n=3-6). \*  $P < 0.01$ ; \*\*  $P < 0.001$ ; \*\*\*  $P < 0.001$ ; NS, not significant. (c) Flow cytometry of cell size of WT, *Tsc1*<sup>-/-</sup> and *Tsc1*<sup>-/-</sup> *Akt*-TG T cells (upper panels). For clarity, comparison between WT and *Akt*-TG T cells was shown in the lower panels. (d) Sorted naïve T cells from WT, *Tsc1*<sup>-/-</sup>, *Akt*-TG, and *Tsc1*<sup>-/-</sup> *Akt*-TG mice were activated with anti-CD3-CD28 for 16 hours, followed by flow cytometry detection of PI<sup>+</sup> apoptotic cells. Data are representative of 3 independent experiments.

## Supplementary Figure 14

**a**

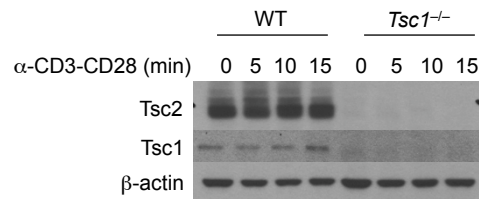

**b**

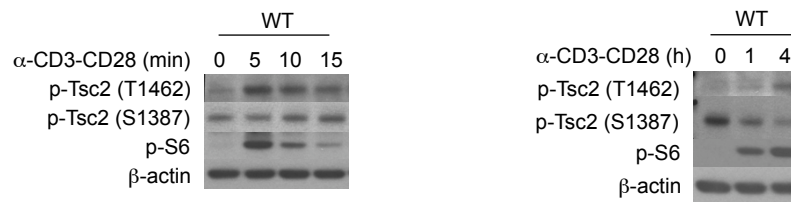

**Supplementary Figure 14. Regulation of Tsc1 and Tsc2 in T cells.** (a) Western blot of Tsc1 and Tsc2 expression in WT and *Tsc1*<sup>-/-</sup> naïve T cells before and after anti-CD3-CD28 stimulation. (b) Western blot of Tsc2 phosphorylation in WT naïve T cells after they were stimulated with anti-CD3-CD28 for short-term (left) or long-term (right) time points. Data are representative of 2-3 independent experiments.

## Supplementary Figure 15

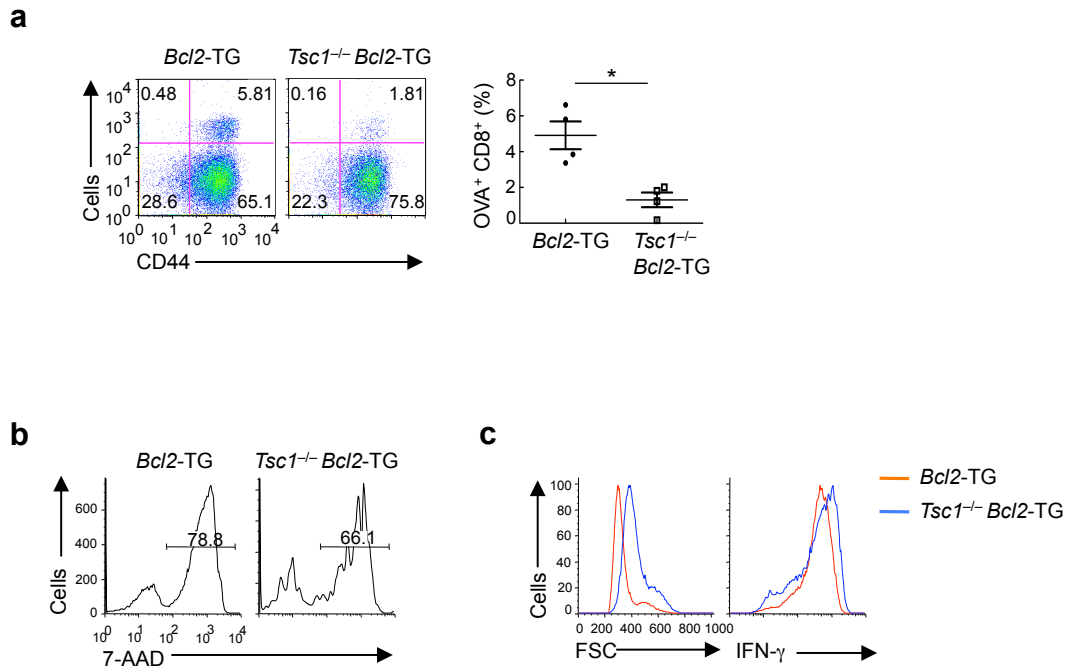

**Supplementary Figure 15. Effects of *Tsc1* deficiency on CD8 T cell response and survival *in vivo* and differentiation *in vitro*.** (a,b) *Bcl2*-TG and *Tsc1*<sup>-/-</sup> *Bcl2*-TG mice were infected with LM-OVA. After 6-7 days, OVA-reactive tetramer-positive CD8 T cells were analyzed by flow cytometry (a). \*  $P < 0.01$ . Tetramer-positive CD8 T cells were purified, cultured in the medium overnight, and stained with 7-AAD to measure the extent of cell death (b). (c) Naïve CD8 T cells from *Bcl2*-TG and *Tsc1*<sup>-/-</sup> *Bcl2*-TG mice were stimulated with anti-CD3, anti-CD28 and IL-2 for 5 days, followed by brief PMA-ionomycin stimulation and analysis of cell size (left) and intracellular staining of IFN- $\gamma$  (right). Data are representative of 2 (a,b) and 4 (c) independent experiments.



Table S1. 186 probe sets with  $\geq 2$ -fold difference in both CD4 *Tsc1*<sup>-/-</sup> vs WT and CD8 *Tsc1*<sup>-/-</sup> vs WT naïve T cells

| HT_HG430_PM     | Gene Symbol              | CD4 WT 0h | CD4 KO 0h | CD8 WT 0h | CD8 KO 0h |
|-----------------|--------------------------|-----------|-----------|-----------|-----------|
|                 |                          | Average   | Average   | Average   | Average   |
| 1419758_PM_at   | Abcb1a                   | 4.41      | 8.49      | 6.30      | 8.99      |
| 1421920_PM_a_at | Ccr9                     | 5.19      | 9.25      | 9.59      | 11.05     |
| 1427419_PM_x_at | Ccr9                     | 6.66      | 10.65     | 10.77     | 11.82     |
| 1421919_PM_a_at | Ccr9                     | 2.65      | 6.37      | 6.77      | 7.95      |
| 1419759_PM_at   | Abcb1a                   | 4.66      | 8.33      | 6.27      | 8.91      |
| 1434428_PM_at   | D330028D13Rik            | 4.86      | 8.47      | 3.99      | 7.43      |
| 1457976_PM_at   | 2010002M12Rik            | 4.66      | 8.23      | 4.64      | 7.18      |
| 1421492_PM_at   | Hpgds                    | 2.84      | 6.05      | 2.78      | 4.93      |
| 1434909_PM_at   | Rragd                    | 3.97      | 6.85      | 3.87      | 6.66      |
| 1453748_PM_a_at | Kif23                    | 3.40      | 6.23      | 5.50      | 6.95      |
| 1421396_PM_at   | Pcsk1                    | 2.71      | 5.46      | 3.16      | 5.77      |
| 1418722_PM_at   | Ngp                      | 3.46      | 6.16      | 4.30      | 6.34      |
| 1419147_PM_at   | Rec8                     | 3.11      | 5.66      | 2.59      | 4.49      |
| 1437445_PM_at   | Trpm1                    | 3.67      | 6.13      | 6.12      | 9.29      |
| 1449310_PM_at   | Ptger2                   | 3.53      | 5.97      | 3.53      | 4.97      |
| 1430735_PM_at   | Patl2                    | 3.66      | 6.07      | 3.90      | 6.56      |
| 1435313_PM_at   | Cd200r4                  | 4.92      | 7.31      | 5.37      | 7.08      |
| 1420805_PM_at   | Myl10                    | 4.50      | 6.84      | 3.69      | 7.67      |
| 1425385_PM_a_at | Igh                      | 2.67      | 5.01      | 3.04      | 5.71      |
| 1417094_PM_at   | Acot7                    | 5.19      | 7.52      | 5.44      | 7.99      |
| 1419598_PM_at   | Ms4a6d                   | 3.64      | 5.91      | 4.62      | 6.15      |
| 1419599_PM_s_at | Ms4a6d                   | 4.99      | 7.24      | 6.18      | 7.80      |
| 1430210_PM_at   | C330024D12Rik            | 4.93      | 7.14      | 5.05      | 7.61      |
| 1440666_PM_at   | 4933430I17Rik            | 2.17      | 4.32      | 2.20      | 3.83      |
| 1438311_PM_at   | 2010002M12Rik            | 2.79      | 4.90      | 2.66      | 4.27      |
| 1418025_PM_at   | Bhlhe40                  | 4.47      | 6.57      | 4.67      | 6.91      |
| 1439831_PM_at   | ---                      | 3.44      | 5.53      | 3.19      | 4.60      |
| 1451335_PM_at   | Plac8                    | 6.96      | 9.03      | 10.54     | 11.60     |
| 1455990_PM_at   | Kif23                    | 6.69      | 8.75      | 8.27      | 9.48      |
| 1420375_PM_at   | Kif3a                    | 4.54      | 6.57      | 3.68      | 5.38      |
| 1424305_PM_at   | Igj                      | 6.13      | 8.04      | 6.07      | 7.83      |
| 1434313_PM_at   | Ccdc126                  | 6.44      | 8.32      | 6.11      | 7.98      |
| 1419691_PM_at   | Camp                     | 3.42      | 5.29      | 3.30      | 5.20      |
| 1452954_PM_at   | Ube2c                    | 3.58      | 5.45      | 3.11      | 5.53      |
| 1448944_PM_at   | Nrp1                     | 4.62      | 6.47      | 3.96      | 6.19      |
| 1429524_PM_at   | Myo1f                    | 3.36      | 5.18      | 6.95      | 8.00      |
| 1424400_PM_a_at | Aldh1l1 /// LOC100047937 | 3.19      | 4.99      | 2.72      | 4.79      |
| 1434437_PM_x_at | Rrm2                     | 4.86      | 6.61      | 4.87      | 7.22      |
| 1448756_PM_at   | S100a9                   | 5.95      | 7.70      | 6.28      | 7.98      |
| 1420505_PM_a_at | Stxbp1                   | 3.66      | 5.41      | 3.91      | 5.08      |
| 1452202_PM_at   | Pde2a                    | 7.68      | 9.42      | 8.89      | 10.11     |
| 1444040_PM_at   | Lair1                    | 4.49      | 6.22      | 4.27      | 6.50      |
| 1416802_PM_a_at | Cdca5                    | 3.39      | 5.12      | 3.75      | 5.88      |
| 1426817_PM_at   | Mki67                    | 3.99      | 5.71      | 3.74      | 6.78      |
| 1422734_PM_a_at | Myb                      | 5.92      | 7.64      | 5.68      | 7.16      |
| 1448226_PM_at   | Rrm2                     | 3.62      | 5.33      | 3.63      | 5.99      |
| 1450920_PM_at   | Ccnb2                    | 3.15      | 4.85      | 3.26      | 5.34      |

|                 |                                                                              |      |       |      |       |
|-----------------|------------------------------------------------------------------------------|------|-------|------|-------|
| 1430447_PM_a_at | Lair1                                                                        | 4.81 | 6.49  | 4.76 | 6.68  |
| 1419394_PM_s_at | S100a8                                                                       | 5.56 | 7.23  | 5.76 | 7.68  |
| 1421317_PM_x_at | Myb                                                                          | 7.87 | 9.54  | 7.61 | 9.32  |
| 1450194_PM_a_at | Myb                                                                          | 7.38 | 9.03  | 7.11 | 8.89  |
| 1424278_PM_a_at | Birc5                                                                        | 3.34 | 4.98  | 3.43 | 5.88  |
| 1452242_PM_at   | Cep55                                                                        | 2.86 | 4.50  | 2.79 | 4.58  |
| 1449841_PM_at   | Kif3a                                                                        | 4.67 | 6.31  | 3.39 | 5.47  |
| 1437602_PM_at   | Fam71b                                                                       | 3.30 | 4.93  | 5.22 | 6.34  |
| 1455790_PM_at   | E2f2                                                                         | 5.93 | 7.55  | 4.91 | 7.26  |
| 1440627_PM_at   | Atp8a2                                                                       | 3.37 | 4.97  | 3.39 | 5.82  |
| 1448943_PM_at   | Nrp1                                                                         | 5.36 | 6.96  | 4.28 | 6.27  |
| 1455442_PM_at   | Slc6a19                                                                      | 2.78 | 4.36  | 7.68 | 8.83  |
| 1449084_PM_s_at | Sh3d19                                                                       | 4.47 | 6.05  | 3.61 | 5.01  |
| 1416343_PM_a_at | Lamp2                                                                        | 5.12 | 6.69  | 5.15 | 6.82  |
| 1436574_PM_at   | 1700029I01Rik                                                                | 5.47 | 7.03  | 6.05 | 7.52  |
| 1436434_PM_at   | E2f2                                                                         | 6.05 | 7.60  | 5.15 | 7.57  |
| 1455049_PM_at   | Igsf3                                                                        | 3.46 | 5.00  | 3.99 | 5.47  |
| 1436847_PM_s_at | Cdca8                                                                        | 4.36 | 5.90  | 4.63 | 6.35  |
| 1426565_PM_at   | Igf1r                                                                        | 5.06 | 6.60  | 4.87 | 6.98  |
| 1425702_PM_a_at | Enpp5                                                                        | 3.87 | 5.41  | 3.54 | 4.88  |
| 1435680_PM_a_at | Dpp7                                                                         | 3.42 | 4.94  | 3.63 | 5.07  |
| 1421375_PM_a_at | S100a6                                                                       | 5.08 | 6.59  | 4.84 | 6.56  |
| 1424354_PM_at   | Tmem140                                                                      | 4.09 | 5.60  | 4.62 | 5.71  |
| 1451461_PM_a_at | Aldoc                                                                        | 4.17 | 5.67  | 3.77 | 5.03  |
| 1418084_PM_at   | Nrp1                                                                         | 4.66 | 6.15  | 3.71 | 5.83  |
| 1421014_PM_a_at | Clybl                                                                        | 6.41 | 7.89  | 6.59 | 7.68  |
| 1415810_PM_at   | Uhrf1                                                                        | 3.89 | 5.36  | 5.00 | 6.70  |
| 1454694_PM_a_at | Top2a                                                                        | 4.61 | 6.08  | 4.47 | 6.41  |
| 1441623_PM_at   | ---                                                                          | 2.73 | 4.19  | 2.91 | 4.46  |
| 1457117_PM_at   | Nfe2l2                                                                       | 5.91 | 7.36  | 5.76 | 7.29  |
| 1425763_PM_x_at | Igh /// Igh-2 /// Igh-VJ558 /// LOC544903                                    | 7.23 | 8.66  | 7.41 | 8.53  |
| 1450646_PM_at   | Cyp51                                                                        | 5.77 | 7.20  | 5.22 | 6.71  |
| 1456328_PM_at   | Bank1                                                                        | 5.57 | 6.99  | 5.66 | 6.71  |
| 1429381_PM_x_at | Igh /// Igh-2 /// Igh-VJ558 /// LOC544903                                    | 6.71 | 8.13  | 6.85 | 8.02  |
| 1421653_PM_a_at | Igh /// Igh-2 /// Igh-VJ558 /// LOC544903                                    | 8.15 | 9.56  | 8.26 | 9.39  |
| 1416957_PM_at   | Pou2af1                                                                      | 6.03 | 7.44  | 6.37 | 7.63  |
| 1459643_PM_at   | ---                                                                          | 2.81 | 4.21  | 2.96 | 4.86  |
| 1436545_PM_at   | Dtx4                                                                         | 5.18 | 6.57  | 5.78 | 7.27  |
| 1439255_PM_s_at | Gpr137b /// Gpr137b-ps /// LOC100044979                                      | 4.95 | 6.34  | 4.08 | 6.08  |
| 1417910_PM_at   | Ccna2                                                                        | 3.71 | 5.09  | 3.59 | 5.79  |
| 1422567_PM_at   | Fam129a                                                                      | 4.34 | 5.69  | 4.80 | 6.00  |
| 1443884_PM_at   | Thada                                                                        | 7.12 | 8.47  | 7.11 | 8.59  |
| 1430985_PM_at   | 1810027O10Rik                                                                | 7.30 | 8.64  | 7.72 | 9.36  |
| 1416441_PM_at   | Pgcp                                                                         | 3.06 | 4.40  | 3.24 | 4.43  |
| 1428562_PM_at   | 2210403K04Rik                                                                | 3.74 | 5.07  | 3.65 | 4.83  |
| 1417300_PM_at   | Smpdl3b                                                                      | 2.96 | 4.29  | 3.17 | 4.81  |
| 1455048_PM_at   | Igsf3                                                                        | 3.83 | 5.14  | 4.08 | 5.74  |
| 1457120_PM_at   | Itk                                                                          | 5.63 | 6.93  | 5.72 | 7.24  |
| 1427455_PM_x_at | Gm10883 /// Gm1420 /// Gm7202 /// Igk /// Igk-C /// Igk-V28 /// LOC100047628 | 8.73 | 10.02 | 8.36 | 10.15 |
| 1450009_PM_at   | Ltf                                                                          | 3.31 | 4.59  | 3.63 | 4.78  |
| 1417457_PM_at   | Cks2                                                                         | 6.64 | 7.92  | 7.76 | 8.81  |

|                 |                                                                                                |       |       |      |       |
|-----------------|------------------------------------------------------------------------------------------------|-------|-------|------|-------|
| 1416046_PM_a_at | Fuca2                                                                                          | 5.94  | 7.22  | 6.38 | 7.67  |
| 1449925_PM_at   | Cxcr3                                                                                          | 4.80  | 6.07  | 6.82 | 8.48  |
| 1448613_PM_at   | Ecm1                                                                                           | 6.73  | 8.00  | 5.07 | 6.29  |
| 1439259_PM_x_at | Abhd4                                                                                          | 4.94  | 6.20  | 5.07 | 6.21  |
| 1455692_PM_x_at | 1700097N02Rik                                                                                  | 6.86  | 8.11  | 7.03 | 8.21  |
| 1424784_PM_at   | OTTMUSG00000010657                                                                             | 3.93  | 5.18  | 4.29 | 5.57  |
| 1425738_PM_at   | LOC100047222 /// LOC676193                                                                     | 3.53  | 4.78  | 3.30 | 4.99  |
| 1424631_PM_a_at | Ighg                                                                                           | 2.96  | 4.19  | 2.19 | 5.62  |
| 1421963_PM_a_at | Cdc25b                                                                                         | 7.02  | 8.24  | 7.40 | 8.54  |
| 1436479_PM_a_at | Dpp7                                                                                           | 4.93  | 6.14  | 4.48 | 6.34  |
| 1460423_PM_x_at | Igk-V1                                                                                         | 4.58  | 5.79  | 3.94 | 5.30  |
| 1417911_PM_at   | Ccna2                                                                                          | 3.85  | 5.04  | 3.57 | 5.33  |
| 1416344_PM_at   | Lamp2                                                                                          | 6.83  | 8.02  | 6.83 | 8.39  |
| 1439067_PM_at   | Lair1                                                                                          | 4.49  | 5.66  | 3.82 | 6.31  |
| 1448314_PM_at   | Cdc2a                                                                                          | 3.49  | 4.67  | 3.36 | 5.06  |
| 1457915_PM_at   | 4833442J19Rik                                                                                  | 4.04  | 5.21  | 3.80 | 4.89  |
| 1435306_PM_a_at | Kif11                                                                                          | 2.83  | 4.00  | 2.63 | 4.53  |
| 1433942_PM_at   | Myo6                                                                                           | 7.06  | 8.23  | 3.59 | 4.67  |
| 1417898_PM_a_at | Gzma                                                                                           | 5.01  | 6.18  | 4.85 | 6.15  |
| 1428094_PM_at   | Lamp2                                                                                          | 7.23  | 8.40  | 6.98 | 8.49  |
| 1446303_PM_at   | Igf1r                                                                                          | 3.70  | 4.86  | 3.81 | 4.98  |
| 1452583_PM_s_at | Galm                                                                                           | 5.74  | 6.90  | 5.67 | 6.70  |
| 1428283_PM_at   | Cyp2s1                                                                                         | 6.11  | 7.26  | 5.12 | 7.55  |
| 1428967_PM_at   | Igf1r                                                                                          | 6.92  | 8.07  | 6.78 | 8.25  |
| 1417185_PM_at   | Ly6a                                                                                           | 10.86 | 12.00 | 9.27 | 11.26 |
| 1419402_PM_at   | Mns1                                                                                           | 5.51  | 6.65  | 6.15 | 7.20  |
| 1429525_PM_s_at | Myo1f                                                                                          | 4.05  | 5.19  | 6.65 | 7.88  |
| 1455711_PM_at   | Dtx4                                                                                           | 3.21  | 4.35  | 3.82 | 5.03  |
| 1417976_PM_at   | Ada                                                                                            | 5.91  | 7.04  | 6.26 | 7.31  |
| 1434503_PM_s_at | Lamp2                                                                                          | 8.21  | 9.34  | 7.98 | 9.37  |
| 1436419_PM_a_at | 1700097N02Rik                                                                                  | 7.18  | 8.31  | 7.40 | 8.67  |
| 1419153_PM_at   | 2810417H13Rik                                                                                  | 6.14  | 7.24  | 5.84 | 7.90  |
| 1457825_PM_x_at | Tcn2                                                                                           | 4.95  | 6.05  | 4.90 | 6.26  |
| 1448143_PM_at   | Aldh2                                                                                          | 6.79  | 7.88  | 4.33 | 5.66  |
| 1452463_PM_x_at | Gm10883                                                                                        | 8.42  | 9.50  | 8.08 | 9.51  |
| 1442183_PM_at   | Gm13238                                                                                        | 5.43  | 6.50  | 5.57 | 6.72  |
| 1417783_PM_at   | Als2                                                                                           | 5.37  | 6.44  | 5.37 | 7.20  |
| 1420394_PM_s_at | Gp49a /// Lilrb4                                                                               | 4.80  | 5.87  | 5.09 | 6.86  |
| 1427660_PM_x_at | Gm10883 /// Gm1420 /// Gm7202 /// Igk /// Igk-C /// Igk-V28 /// LOC100047628                   | 9.86  | 10.93 | 9.52 | 11.03 |
| 1439256_PM_x_at | Gpr137b-ps                                                                                     | 4.76  | 5.81  | 4.60 | 5.82  |
| 1448646_PM_at   | Wdr12                                                                                          | 7.59  | 8.63  | 7.29 | 8.31  |
| 1455065_PM_x_at | Gnpda1                                                                                         | 7.73  | 8.77  | 7.44 | 8.64  |
| 1456225_PM_x_at | Trib3                                                                                          | 5.43  | 6.45  | 4.64 | 5.96  |
| 1452982_PM_at   | Igf1r                                                                                          | 6.73  | 7.75  | 6.45 | 8.20  |
| 1424118_PM_a_at | Spc25                                                                                          | 3.47  | 4.48  | 3.46 | 5.11  |
| 1449048_PM_s_at | Rab4a                                                                                          | 3.29  | 4.30  | 3.52 | 4.76  |
| 1439293_PM_at   | BC031353                                                                                       | 6.78  | 7.78  | 6.77 | 7.96  |
| 1450881_PM_s_at | Gpr137b                                                                                        | 4.61  | 5.61  | 4.03 | 5.33  |
| 1452417_PM_x_at | 2010205A11Rik /// Gm10883 /// Gm1420 /// Gm7202 /// Igk /// Igk-C /// Igk-V28 /// LOC100047628 | 9.71  | 10.71 | 9.36 | 10.86 |
| 1435545_PM_at   | BC032203                                                                                       | 7.59  | 6.59  | 6.91 | 5.49  |
| 1418989_PM_at   | Ctse                                                                                           | 7.93  | 6.92  | 6.93 | 5.90  |

|                 |               |       |      |       |      |
|-----------------|---------------|-------|------|-------|------|
| 1427442_PM_a_at | App           | 8.13  | 7.10 | 7.62  | 6.59 |
| 1448297_PM_a_at | Tnk2          | 7.97  | 6.93 | 7.93  | 6.77 |
| 1444005_PM_at   | ---           | 4.64  | 3.58 | 4.51  | 3.41 |
| 1459595_PM_at   | ---           | 5.84  | 4.72 | 5.53  | 3.92 |
| 1448298_PM_at   | Tnk2          | 5.25  | 4.12 | 5.11  | 3.98 |
| 1433977_PM_at   | Hs3st3b1      | 7.07  | 5.92 | 6.00  | 4.82 |
| 1423059_PM_at   | Ptk2          | 4.86  | 3.69 | 4.10  | 2.92 |
| 1434473_PM_at   | Slc16a5       | 7.80  | 6.62 | 7.91  | 6.70 |
| 1437303_PM_at   | Il6st         | 9.06  | 7.88 | 9.04  | 7.24 |
| 1425245_PM_a_at | Rgs11         | 5.30  | 4.08 | 5.54  | 4.18 |
| 1418210_PM_at   | Pfn2          | 5.10  | 3.84 | 4.25  | 3.16 |
| 1423415_PM_at   | Gpr83         | 5.52  | 4.24 | 4.28  | 3.25 |
| 1428122_PM_s_at | Fam125b       | 6.44  | 5.14 | 6.34  | 4.46 |
| 1437868_PM_at   | Fam46a        | 7.86  | 6.54 | 8.52  | 7.52 |
| 1437064_PM_at   | Ar            | 5.42  | 4.09 | 5.57  | 4.16 |
| 1424455_PM_at   | Gprasp1       | 7.80  | 6.46 | 7.18  | 6.05 |
| 1448485_PM_at   | Ggt1          | 5.16  | 3.81 | 8.03  | 6.36 |
| 1418216_PM_at   | Ggt5          | 6.60  | 5.21 | 5.59  | 4.39 |
| 1434601_PM_at   | Amigo2        | 6.28  | 4.86 | 5.29  | 4.26 |
| 1421991_PM_a_at | Igfbp4        | 5.59  | 4.17 | 5.16  | 3.29 |
| 1456751_PM_x_at | A530021J07Rik | 5.68  | 4.25 | 3.78  | 2.09 |
| 1436585_PM_at   | BB182297      | 5.88  | 4.42 | 5.45  | 4.32 |
| 1455647_PM_at   | Ar            | 5.59  | 4.10 | 5.70  | 4.53 |
| 1452714_PM_at   | Tanc1         | 6.60  | 5.00 | 7.09  | 5.79 |
| 1421840_PM_at   | Abca1         | 7.35  | 5.74 | 7.87  | 5.89 |
| 1455747_PM_at   | Ggt5          | 6.12  | 4.32 | 4.87  | 3.69 |
| 1445450_PM_x_at | A530021J07Rik | 6.04  | 4.10 | 4.45  | 2.15 |
| 1456878_PM_at   | AI646023      | 4.21  | 2.23 | 5.81  | 3.32 |
| 1437406_PM_x_at | Igfbp4        | 9.82  | 7.78 | 9.05  | 5.71 |
| 1458977_PM_at   | A530021J07Rik | 6.15  | 3.95 | 3.80  | 2.21 |
| 1423757_PM_x_at | Igfbp4        | 10.28 | 8.05 | 9.45  | 5.67 |
| 1437405_PM_a_at | Igfbp4        | 11.60 | 9.37 | 10.72 | 6.23 |
| 1421992_PM_a_at | Igfbp4        | 8.88  | 6.53 | 7.94  | 4.82 |
| 1427127_PM_x_at | Hspa1b        | 8.42  | 6.03 | 7.90  | 4.51 |
| 1423756_PM_s_at | Igfbp4        | 10.70 | 8.19 | 9.74  | 4.91 |
| 1452318_PM_a_at | Hspa1b        | 9.11  | 6.57 | 8.71  | 5.43 |
| 1427126_PM_at   | Hspa1b        | 8.25  | 5.68 | 7.58  | 4.40 |

Table S2. 342 probe sets with  $\geq 2$ -fold difference in CD4 *Tsc1*<sup>-/-</sup> vs WT cells after 4 h TCR stimulation (FDR<0.1)

| HT_HG430_PM     | Gene Symbol                                                                                    | CD4 WT 0h<br>Average | CD4 KO 0h<br>Average | CD4 WT 4h<br>Average | CD4 KO 4h<br>Average |
|-----------------|------------------------------------------------------------------------------------------------|----------------------|----------------------|----------------------|----------------------|
| 1419758_PM_at   | Abcb1a                                                                                         | 4.41                 | 8.49                 | 4.36                 | 8.32                 |
| 1419759_PM_at   | Abcb1a                                                                                         | 4.66                 | 8.33                 | 4.39                 | 8.08                 |
| 1439831_PM_at   | ---                                                                                            | 3.44                 | 5.53                 | 5.93                 | 9.15                 |
| 1419394_PM_s_at | S100a8                                                                                         | 5.56                 | 7.23                 | 4.55                 | 7.67                 |
| 1418722_PM_at   | Ngp                                                                                            | 3.46                 | 6.16                 | 3.34                 | 6.35                 |
| 1434909_PM_at   | Rragd                                                                                          | 3.97                 | 6.85                 | 3.76                 | 6.77                 |
| 1448756_PM_at   | S100a9                                                                                         | 5.95                 | 7.70                 | 5.06                 | 7.98                 |
| 1447285_PM_at   | ---                                                                                            | 4.01                 | 5.09                 | 6.94                 | 9.80                 |
| 1419691_PM_at   | Camp                                                                                           | 3.42                 | 5.29                 | 3.02                 | 5.52                 |
| 1420505_PM_a_at | Stxbp1                                                                                         | 3.66                 | 5.41                 | 4.12                 | 6.46                 |
| 1417094_PM_at   | Acot7                                                                                          | 5.19                 | 7.52                 | 4.86                 | 7.16                 |
| 1451335_PM_at   | Plac8                                                                                          | 6.96                 | 9.03                 | 5.47                 | 7.75                 |
| 1421396_PM_at   | Pcsk1                                                                                          | 2.71                 | 5.46                 | 2.78                 | 5.02                 |
| 1426817_PM_at   | Mki67                                                                                          | 3.99                 | 5.71                 | 3.36                 | 5.58                 |
| 1444588_PM_at   | ---                                                                                            | 2.49                 | 3.07                 | 3.18                 | 5.33                 |
| 1449310_PM_at   | Ptger2                                                                                         | 3.53                 | 5.97                 | 4.66                 | 6.80                 |
| 1435172_PM_at   | Eomes                                                                                          | 5.64                 | 6.89                 | 4.88                 | 6.95                 |
| 1427419_PM_x_at | Ccr9                                                                                           | 6.66                 | 10.65                | 3.83                 | 5.87                 |
| 1450070_PM_s_at | Pak1                                                                                           | 5.25                 | 5.25                 | 5.15                 | 7.17                 |
| 1422804_PM_at   | Serpnb6b                                                                                       | 5.58                 | 6.67                 | 5.25                 | 7.26                 |
| 1452954_PM_at   | Ube2c                                                                                          | 3.58                 | 5.45                 | 2.80                 | 4.80                 |
| 1444103_PM_at   | Epsti1                                                                                         | 5.35                 | 6.07                 | 3.64                 | 5.58                 |
| 1457976_PM_at   | 2010002M12Rik                                                                                  | 4.66                 | 8.23                 | 4.52                 | 6.44                 |
| 1427455_PM_x_at | Gm10883 /// Gm1420 /// Gm7202 /// Igh /// Igh-C /// Igh-V28 /// LOC100047628                   | 8.73                 | 10.02                | 8.07                 | 9.99                 |
| 1425763_PM_x_at | Igh /// Igh-2 /// Igh-VJ558 /// LOC544903                                                      | 7.23                 | 8.66                 | 6.60                 | 8.51                 |
| 1435313_PM_at   | Cd200r4                                                                                        | 4.92                 | 7.31                 | 3.08                 | 4.95                 |
| 1429381_PM_x_at | Igh /// Igh-2 /// Igh-VJ558 /// LOC544903                                                      | 6.71                 | 8.13                 | 6.09                 | 7.96                 |
| 1424305_PM_at   | Igj                                                                                            | 6.13                 | 8.04                 | 6.17                 | 8.04                 |
| 1416592_PM_at   | Glrx                                                                                           | 7.23                 | 8.33                 | 5.39                 | 7.25                 |
| 1437502_PM_x_at | Cd24a                                                                                          | 4.23                 | 4.87                 | 4.90                 | 6.75                 |
| 1426001_PM_at   | Eomes                                                                                          | 5.67                 | 6.84                 | 5.21                 | 7.06                 |
| 1421653_PM_a_at | Igh /// Igh-2 /// Igh-VJ558 /// LOC544903                                                      | 8.15                 | 9.56                 | 7.38                 | 9.21                 |
| 1418248_PM_at   | Gla                                                                                            | 3.90                 | 4.72                 | 3.31                 | 5.13                 |
| 1425947_PM_at   | Ifng                                                                                           | 2.77                 | 3.28                 | 4.68                 | 6.50                 |
| 1432282_PM_a_at | Tlcd2                                                                                          | 3.15                 | 3.46                 | 3.40                 | 5.21                 |
| 1440387_PM_at   | 6820431F20Rik                                                                                  | 3.41                 | 4.09                 | 4.13                 | 5.92                 |
| 1452417_PM_x_at | 2010205A11Rik /// Gm10883 /// Gm1420 /// Gm7202 /// Igh /// Igh-C /// Igh-V28 /// LOC100047628 | 9.71                 | 10.71                | 9.04                 | 10.80                |
| 1435529_PM_at   | Gm14446                                                                                        | 10.52                | 11.70                | 9.64                 | 11.39                |
| 1427660_PM_x_at | Gm10883 /// Gm1420 /// Gm7202 /// Igh /// Igh-C /// Igh-V28 /// LOC100047628                   | 9.86                 | 10.93                | 9.26                 | 11.01                |
| 1424354_PM_at   | Tmem140                                                                                        | 4.09                 | 5.60                 | 5.23                 | 6.96                 |
| 1436996_PM_x_at | Lyz1                                                                                           | 7.14                 | 7.83                 | 4.81                 | 6.53                 |
| 1453851_PM_a_at | Gadd45g                                                                                        | 5.27                 | 5.76                 | 5.00                 | 6.71                 |

|                 |                                         |       |       |      |       |
|-----------------|-----------------------------------------|-------|-------|------|-------|
| 1435245_PM_at   | Gls2                                    | 2.49  | 2.55  | 2.92 | 4.63  |
| 1452087_PM_at   | Epsti1                                  | 10.00 | 11.03 | 7.18 | 8.87  |
| 1418191_PM_at   | LOC100048346 /// Usp18                  | 8.26  | 7.99  | 7.24 | 8.92  |
| 1421375_PM_a_at | S100a6                                  | 5.08  | 6.59  | 3.61 | 5.29  |
| 1416034_PM_at   | Cd24a                                   | 4.07  | 4.24  | 4.26 | 5.94  |
| 1417898_PM_a_at | Gzma                                    | 5.01  | 6.18  | 3.25 | 4.92  |
| 1423547_PM_at   | Lyz2                                    | 6.46  | 6.91  | 3.60 | 5.26  |
| 1455692_PM_x_at | 1700097N02Rik                           | 6.86  | 8.11  | 3.67 | 5.32  |
| 1425546_PM_a_at | Trf                                     | 4.11  | 4.16  | 3.14 | 4.79  |
| 1449025_PM_at   | Ifit3                                   | 8.38  | 8.13  | 7.58 | 9.21  |
| 1420979_PM_at   | Pak1                                    | 4.21  | 4.04  | 3.64 | 5.27  |
| 1457780_PM_at   | Stx11                                   | 2.80  | 3.50  | 5.28 | 6.90  |
| 1421571_PM_a_at | LOC100045833 /// Ly6c1 /// Ly6c2        | 10.91 | 12.16 | 9.62 | 11.24 |
| 1422734_PM_a_at | Myb                                     | 5.92  | 7.64  | 7.15 | 8.77  |
| 1426208_PM_x_at | Plagl1                                  | 3.08  | 2.98  | 6.87 | 8.48  |
| 1418025_PM_at   | Bhlhe40                                 | 4.47  | 6.57  | 6.19 | 7.80  |
| 1419647_PM_a_at | Ier3                                    | 3.14  | 3.10  | 4.30 | 5.90  |
| 1452463_PM_x_at | Gm10883                                 | 8.42  | 9.50  | 7.90 | 9.49  |
| 1439255_PM_s_at | Gpr137b /// Gpr137b-ps /// LOC100044979 | 4.95  | 6.34  | 4.28 | 5.87  |
| 1438311_PM_at   | 2010002M12Rik                           | 2.79  | 4.90  | 2.72 | 4.30  |
| 1434437_PM_x_at | Rrm2                                    | 4.86  | 6.61  | 4.81 | 6.38  |
| 1454942_PM_at   | Fam129a                                 | 5.18  | 5.99  | 4.86 | 6.43  |
| 1416593_PM_at   | Glrx                                    | 6.28  | 7.45  | 4.26 | 5.82  |
| 1449864_PM_at   | Il4                                     | 2.28  | 2.30  | 3.08 | 4.64  |
| 1434830_PM_at   | Mxd1                                    | 5.72  | 5.92  | 7.15 | 8.68  |
| 1448226_PM_at   | Rrm2                                    | 3.62  | 5.33  | 3.48 | 5.01  |
| 1422567_PM_at   | Fam129a                                 | 4.34  | 5.69  | 4.51 | 6.03  |
| 1428660_PM_s_at | LOC100047963 /// Tor3a                  | 5.00  | 5.44  | 4.46 | 5.98  |
| 1416046_PM_a_at | Fuca2                                   | 5.94  | 7.22  | 3.65 | 5.16  |
| 1449773_PM_s_at | Gadd45b                                 | 6.04  | 6.17  | 8.79 | 10.31 |
| 1452426_PM_x_at | ---                                     | 6.07  | 6.95  | 5.17 | 6.66  |
| 1415810_PM_at   | Uhrf1                                   | 3.89  | 5.36  | 4.13 | 5.63  |
| 1424923_PM_at   | Serpina3g                               | 3.83  | 4.92  | 3.98 | 5.47  |
| 1417910_PM_at   | Ccna2                                   | 3.71  | 5.09  | 3.39 | 4.88  |
| 1455768_PM_at   | Npc2                                    | 7.00  | 7.77  | 6.60 | 8.09  |
| 1419985_PM_s_at | Ccdc69                                  | 8.37  | 8.51  | 3.48 | 4.95  |
| 1424278_PM_a_at | Birc5                                   | 3.34  | 4.98  | 3.14 | 4.61  |
| 1448182_PM_a_at | Cd24a                                   | 5.96  | 6.38  | 6.54 | 8.01  |
| 1450971_PM_at   | Gadd45b                                 | 7.06  | 7.10  | 9.59 | 11.06 |
| 1438169_PM_a_at | Frmd4b                                  | 3.84  | 4.73  | 4.94 | 6.41  |
| 1418872_PM_at   | Abcb1b                                  | 5.58  | 6.87  | 5.87 | 7.33  |
| 1416503_PM_at   | Lxn                                     | 5.62  | 6.53  | 5.74 | 7.19  |
| 1454694_PM_a_at | Top2a                                   | 4.61  | 6.08  | 4.66 | 6.11  |
| 1429488_PM_at   | Zdhhc21                                 | 6.98  | 7.14  | 5.68 | 7.13  |
| 1420394_PM_s_at | Gp49a /// Lilrb4                        | 4.80  | 5.87  | 5.79 | 7.23  |
| 1424638_PM_at   | Cdkn1a                                  | 3.83  | 3.91  | 4.98 | 6.42  |
| 1436574_PM_at   | 1700029I01Rik                           | 5.47  | 7.03  | 4.16 | 5.60  |

|                 |                                                                                                                                                                                         |       |       |      |       |
|-----------------|-----------------------------------------------------------------------------------------------------------------------------------------------------------------------------------------|-------|-------|------|-------|
| 1424067_PM_at   | Icam1                                                                                                                                                                                   | 6.65  | 7.43  | 8.67 | 10.11 |
| 1416802_PM_a_at | Cdca5                                                                                                                                                                                   | 3.39  | 5.12  | 3.82 | 5.25  |
| 1419599_PM_s_at | Ms4a6d                                                                                                                                                                                  | 4.99  | 7.24  | 3.88 | 5.31  |
| 1422527_PM_at   | H2-DMa                                                                                                                                                                                  | 7.85  | 8.96  | 6.90 | 8.33  |
| 1418930_PM_at   | Cxcl10                                                                                                                                                                                  | 3.43  | 3.15  | 8.17 | 9.59  |
| 1455104_PM_at   | Mxd1                                                                                                                                                                                    | 4.86  | 5.38  | 6.05 | 7.47  |
| 1436479_PM_a_at | Dpp7                                                                                                                                                                                    | 4.93  | 6.14  | 3.35 | 4.76  |
| 1449874_PM_at   | Ly96                                                                                                                                                                                    | 2.95  | 4.57  | 2.92 | 4.31  |
| 1436576_PM_at   | Fam26f                                                                                                                                                                                  | 8.16  | 9.33  | 7.90 | 9.29  |
| 1421998_PM_at   | Tor3a                                                                                                                                                                                   | 4.72  | 5.13  | 4.59 | 5.97  |
| 1426179_PM_a_at | Twsg1                                                                                                                                                                                   | 2.95  | 3.17  | 3.56 | 4.93  |
| 1418649_PM_at   | Egln3                                                                                                                                                                                   | 3.38  | 3.72  | 3.22 | 4.59  |
| 1421317_PM_x_at | Myb                                                                                                                                                                                     | 7.87  | 9.54  | 9.20 | 10.57 |
| 1438009_PM_at   | Hist1h2ad                                                                                                                                                                               | 9.58  | 10.33 | 8.33 | 9.69  |
| 1421679_PM_a_at | Cdkn1a                                                                                                                                                                                  | 3.44  | 3.80  | 4.82 | 6.19  |
| 1460314_PM_s_at | <small>Hist1h3a // Hist1h3b // Hist1h3c // Hist1h3d // Hist1h3e // Hist1h3f // Hist1h3g // Hist1h3h // Hist1h3i // Hist1h3j // Hist1h3k // Hist1h3l</small>                             | 6.59  | 6.54  | 5.13 | 6.49  |
| 1450194_PM_a_at | Myb                                                                                                                                                                                     | 7.38  | 9.03  | 8.70 | 10.06 |
| 1422601_PM_at   | Serpibn9                                                                                                                                                                                | 6.08  | 6.57  | 5.50 | 6.85  |
| 1453228_PM_at   | Stx11                                                                                                                                                                                   | 3.99  | 4.77  | 5.81 | 7.16  |
| 1419821_PM_s_at | Idh1                                                                                                                                                                                    | 4.49  | 5.28  | 4.43 | 5.77  |
| 1454953_PM_at   | Rnf157                                                                                                                                                                                  | 3.73  | 4.45  | 5.24 | 6.58  |
| 1429400_PM_at   | Clcn5                                                                                                                                                                                   | 5.03  | 5.47  | 5.03 | 6.37  |
| 1455899_PM_x_at | Socs3                                                                                                                                                                                   | 10.25 | 10.65 | 8.96 | 10.29 |
| 1448656_PM_at   | Cacnb3                                                                                                                                                                                  | 3.88  | 4.73  | 4.21 | 5.54  |
| 1423393_PM_at   | Clic4                                                                                                                                                                                   | 8.16  | 8.66  | 8.96 | 10.29 |
| 1454169_PM_a_at | Epsti1                                                                                                                                                                                  | 8.74  | 9.97  | 6.42 | 7.75  |
| 1442183_PM_at   | Gm13238                                                                                                                                                                                 | 5.43  | 6.50  | 4.20 | 5.53  |
| 1449925_PM_at   | Cxcr3                                                                                                                                                                                   | 4.80  | 6.07  | 4.28 | 5.60  |
| 1440400_PM_at   | Rnf157                                                                                                                                                                                  | 3.27  | 4.28  | 5.93 | 7.23  |
| 1450291_PM_s_at | Ms4a4c                                                                                                                                                                                  | 8.13  | 10.00 | 7.21 | 8.51  |
| 1448314_PM_at   | Cdc2a                                                                                                                                                                                   | 3.49  | 4.67  | 3.27 | 4.56  |
| 1417976_PM_at   | Ada                                                                                                                                                                                     | 5.91  | 7.04  | 6.03 | 7.32  |
| 1416910_PM_at   | Dnajc15                                                                                                                                                                                 | 9.17  | 10.50 | 8.26 | 9.54  |
| 1417909_PM_at   | Serpinc1                                                                                                                                                                                | 3.09  | 3.24  | 4.45 | 5.74  |
| 1438606_PM_a_at | Clic4                                                                                                                                                                                   | 7.87  | 8.42  | 8.68 | 9.97  |
| 1416309_PM_at   | Nusap1                                                                                                                                                                                  | 3.46  | 4.38  | 3.33 | 4.62  |
| 1417601_PM_at   | Rgs1                                                                                                                                                                                    | 7.61  | 8.22  | 8.61 | 9.89  |
| 1434372_PM_at   | AW112010                                                                                                                                                                                | 10.74 | 11.81 | 9.99 | 11.27 |
| 1422948_PM_s_at | <small>Hist1h4a // Hist1h4b // Hist1h4c // Hist1h4d // Hist1h4e // Hist1h4f // Hist1h4g // Hist1h4h // Hist1h4i // Hist1h4j // Hist1h4k // Hist1h4l // Hist1h4m // LOC100041230</small> | 8.11  | 8.26  | 7.40 | 8.68  |
| 1450886_PM_at   | Gsg2                                                                                                                                                                                    | 5.26  | 5.71  | 5.10 | 6.38  |
| 1416832_PM_at   | Slc39a8                                                                                                                                                                                 | 4.84  | 5.46  | 4.57 | 5.85  |
| 1422979_PM_at   | Suv39h2                                                                                                                                                                                 | 2.51  | 2.61  | 3.09 | 4.36  |
| 1429049_PM_at   | Nuak2                                                                                                                                                                                   | 5.51  | 6.16  | 5.57 | 6.83  |
| 1449852_PM_a_at | Ehd4                                                                                                                                                                                    | 3.59  | 4.30  | 4.24 | 5.50  |
| 1456212_PM_x_at | Socs3                                                                                                                                                                                   | 9.49  | 9.86  | 8.23 | 9.49  |
| 1455106_PM_a_at | Ckb                                                                                                                                                                                     | 5.97  | 6.67  | 4.56 | 5.81  |
| 1417457_PM_at   | Cks2                                                                                                                                                                                    | 6.64  | 7.92  | 9.17 | 10.43 |

|                 |               |      |      |       |       |
|-----------------|---------------|------|------|-------|-------|
| 1427429_PM_at   | Csf2          | 2.54 | 2.75 | 2.80  | 4.05  |
| 1443207_PM_at   | ---           | 3.14 | 3.35 | 4.12  | 5.37  |
| 1434428_PM_at   | D330028D13Rik | 4.86 | 8.47 | 4.89  | 6.14  |
| 1446670_PM_at   | ---           | 6.87 | 7.37 | 5.62  | 6.86  |
| 1424775_PM_at   | Oas1a         | 7.62 | 8.31 | 6.64  | 7.89  |
| 1416702_PM_at   | Serpini1      | 6.11 | 6.89 | 5.55  | 6.80  |
| 1416576_PM_at   | Socs3         | 7.89 | 8.30 | 6.67  | 7.92  |
| 1431776_PM_at   | Tob2          | 3.79 | 3.54 | 3.90  | 5.14  |
| 1419147_PM_at   | Rec8          | 3.11 | 5.66 | 2.81  | 4.04  |
| 1439680_PM_at   | Tnfsf10       | 6.13 | 5.99 | 3.59  | 4.82  |
| 1455790_PM_at   | E2f2          | 5.93 | 7.55 | 3.46  | 4.69  |
| 1436847_PM_s_at | Cdca8         | 4.36 | 5.90 | 5.65  | 6.88  |
| 1428306_PM_at   | Ddit4         | 9.15 | 9.56 | 5.91  | 7.14  |
| 1436201_PM_x_at | Mbp           | 2.52 | 3.12 | 4.34  | 5.57  |
| 1428468_PM_at   | 3110043O21Rik | 5.42 | 5.00 | 6.07  | 7.27  |
| 1448148_PM_at   | Grn           | 5.19 | 6.17 | 4.36  | 5.56  |
| 1441242_PM_at   | ---           | 6.10 | 6.38 | 4.87  | 6.07  |
| 1448143_PM_at   | Aldh2         | 6.79 | 7.88 | 5.87  | 7.06  |
| 1426774_PM_at   | Parp12        | 6.51 | 6.82 | 6.56  | 7.75  |
| 1426073_PM_at   | Twsg1         | 2.78 | 2.70 | 3.31  | 4.50  |
| 1418764_PM_a_at | Bpnt1         | 5.36 | 5.49 | 5.70  | 6.88  |
| 1429863_PM_at   | Lonrf3        | 2.60 | 2.83 | 3.20  | 4.38  |
| 1449168_PM_a_at | Akap2         | 4.51 | 4.54 | 4.45  | 5.62  |
| 1427202_PM_at   | 4833442J19Rik | 7.10 | 8.09 | 7.17  | 8.34  |
| 1456956_PM_at   | Ikzf2         | 4.85 | 4.82 | 4.75  | 5.92  |
| 1419297_PM_at   | H2-Oa         | 5.65 | 6.53 | 3.55  | 4.72  |
| 1436026_PM_at   | Zfp703        | 6.15 | 6.48 | 7.31  | 8.48  |
| 1421920_PM_a_at | Ccr9          | 5.19 | 9.25 | 3.34  | 4.50  |
| 1450476_PM_at   | Cnr2          | 5.14 | 6.85 | 3.38  | 4.54  |
| 1418104_PM_at   | Nrip3         | 2.38 | 2.47 | 3.16  | 4.32  |
| 1439790_PM_at   | Serpib9       | 3.92 | 4.21 | 3.45  | 4.61  |
| 1436297_PM_a_at | Grina         | 7.91 | 8.60 | 6.63  | 7.78  |
| 1419598_PM_at   | Ms4a6d        | 3.64 | 5.91 | 2.83  | 3.98  |
| 1416957_PM_at   | Pou2af1       | 6.03 | 7.44 | 5.70  | 6.85  |
| 1424339_PM_at   | Oasl1         | 6.15 | 6.31 | 5.24  | 6.39  |
| 1423392_PM_at   | Clic4         | 4.63 | 5.45 | 5.54  | 6.69  |
| 1417698_PM_at   | Gtf2f1        | 7.97 | 8.74 | 7.84  | 8.99  |
| 1419042_PM_at   | ligp1         | 8.12 | 9.16 | 11.22 | 12.36 |
| 1415673_PM_at   | Psph          | 7.60 | 8.27 | 6.14  | 7.28  |
| 1456006_PM_at   | Bcl2l11       | 6.27 | 6.62 | 7.75  | 8.88  |
| 1452837_PM_at   | Lpin2         | 5.56 | 6.56 | 5.47  | 6.61  |
| 1448449_PM_at   | Ripk3         | 6.69 | 7.70 | 6.83  | 7.96  |
| 1424140_PM_at   | Gale          | 4.56 | 5.53 | 4.88  | 6.01  |
| 1452123_PM_s_at | Frmd4b        | 4.14 | 5.01 | 5.45  | 6.58  |
| 1448303_PM_at   | Gpnmb         | 3.72 | 5.11 | 3.73  | 4.85  |
| 1436419_PM_a_at | 1700097N02Rik | 7.18 | 8.31 | 4.23  | 5.36  |
| 1449363_PM_at   | Atf3          | 3.58 | 3.50 | 4.90  | 6.02  |



|                 |                                                                                                                                                                  |      |       |      |      |
|-----------------|------------------------------------------------------------------------------------------------------------------------------------------------------------------|------|-------|------|------|
| 1440866_PM_at   | Eif2ak2                                                                                                                                                          | 5.41 | 5.41  | 5.36 | 6.48 |
| 1424118_PM_a_at | Spc25                                                                                                                                                            | 3.47 | 4.48  | 3.74 | 4.86 |
| 1448944_PM_at   | Nrp1                                                                                                                                                             | 4.62 | 6.47  | 3.84 | 4.95 |
| 1425685_PM_at   | Akr1b10                                                                                                                                                          | 4.84 | 5.21  | 4.02 | 5.13 |
| 1426550_PM_at   | Sidt1                                                                                                                                                            | 8.09 | 8.69  | 6.31 | 7.42 |
| 1453003_PM_at   | Sorl1                                                                                                                                                            | 7.03 | 7.51  | 4.75 | 5.86 |
| 1429816_PM_at   | Armc3                                                                                                                                                            | 5.34 | 6.29  | 3.14 | 4.24 |
| 1455908_PM_a_at | Scpep1                                                                                                                                                           | 5.08 | 5.95  | 4.61 | 5.71 |
| 1452836_PM_at   | Lpin2                                                                                                                                                            | 6.26 | 7.27  | 5.98 | 7.08 |
| 1431734_PM_a_at | Dnajb4                                                                                                                                                           | 5.52 | 5.87  | 5.78 | 6.87 |
| 1420197_PM_at   | Gadd45b                                                                                                                                                          | 2.81 | 2.87  | 3.80 | 4.89 |
| 1440047_PM_at   | Socs1                                                                                                                                                            | 6.37 | 6.15  | 7.79 | 8.88 |
| 1451310_PM_a_at | Ctsl                                                                                                                                                             | 6.57 | 7.92  | 7.64 | 8.73 |
| 1436545_PM_at   | Dtx4                                                                                                                                                             | 5.18 | 6.57  | 4.97 | 6.06 |
| 1457673_PM_at   | 6820431F20Rik                                                                                                                                                    | 4.13 | 4.07  | 6.56 | 7.65 |
| 1439040_PM_at   | Cenpe                                                                                                                                                            | 2.53 | 3.15  | 2.52 | 3.60 |
| 1456036_PM_x_at | Gsto1                                                                                                                                                            | 6.37 | 6.66  | 5.76 | 6.84 |
| 1457445_PM_at   | Trps1                                                                                                                                                            | 6.00 | 5.81  | 6.02 | 7.10 |
| 1417654_PM_at   | Sdc4                                                                                                                                                             | 3.36 | 3.86  | 4.65 | 5.74 |
| 1437621_PM_x_at | Gm7669 /// Gm7901 /// Gm9347 /// Phgdh                                                                                                                           | 8.70 | 9.14  | 7.08 | 8.16 |
| 1418932_PM_at   | LOC100046232 /// Nfil3                                                                                                                                           | 3.62 | 3.62  | 4.81 | 5.89 |
| 1420671_PM_x_at | Ms4a4c                                                                                                                                                           | 8.98 | 10.68 | 8.24 | 9.31 |
| 1452646_PM_at   | Trp53inp2                                                                                                                                                        | 3.34 | 4.08  | 5.45 | 6.52 |
| 1415822_PM_at   | Scd2                                                                                                                                                             | 8.19 | 9.17  | 5.60 | 6.66 |
| 1426258_PM_at   | Sorl1                                                                                                                                                            | 8.00 | 8.47  | 6.22 | 7.29 |
| 1426334_PM_a_at | Bcl2l11                                                                                                                                                          | 2.62 | 3.05  | 4.36 | 5.42 |
| 1421688_PM_a_at | Ccl1                                                                                                                                                             | 3.62 | 3.39  | 4.05 | 5.11 |
| 1423775_PM_s_at | Prc1                                                                                                                                                             | 3.96 | 4.44  | 4.10 | 5.16 |
| 1418696_PM_at   | Ttc36                                                                                                                                                            | 2.98 | 3.05  | 3.81 | 4.87 |
| 1417911_PM_at   | Ccna2                                                                                                                                                            | 3.85 | 5.04  | 3.68 | 4.74 |
| 1448471_PM_a_at | Ctla2a                                                                                                                                                           | 6.13 | 6.18  | 6.72 | 7.78 |
| 1452352_PM_at   | Ctla2b                                                                                                                                                           | 2.75 | 3.41  | 3.24 | 4.30 |
| 1429171_PM_a_at | Ncapg                                                                                                                                                            | 2.39 | 3.23  | 2.39 | 3.45 |
| 1460042_PM_at   | Slc23a3                                                                                                                                                          | 2.45 | 2.30  | 3.60 | 4.66 |
| 1454714_PM_x_at | Gm7669 /// Gm7901 /// Gm9347 /// Phgdh                                                                                                                           | 8.70 | 9.15  | 7.23 | 8.29 |
| 1449530_PM_at   | Trps1                                                                                                                                                            | 6.10 | 6.05  | 6.80 | 7.86 |
| 1456471_PM_x_at | <small>10527627 /// Gm1337 /// Gm1385 /// Gm7669 /// Gm7901 /// Gm8206 /// Gm8341 /// Gm8310 /// Gm8251 /// Gm8347 /// LOC320761 /// LOC320806 /// Phgdh</small> | 7.39 | 7.83  | 5.95 | 7.00 |
| 1455990_PM_at   | Kif23                                                                                                                                                            | 6.69 | 8.75  | 5.12 | 6.18 |
| 1427364_PM_a_at | Odc1                                                                                                                                                             | 4.80 | 5.00  | 7.41 | 8.46 |
| 1451828_PM_a_at | Acsl4                                                                                                                                                            | 4.62 | 5.16  | 6.20 | 7.25 |
| 1436011_PM_at   | Elmo2                                                                                                                                                            | 4.60 | 4.66  | 5.59 | 6.64 |
| 1456228_PM_x_at | Mbp                                                                                                                                                              | 2.79 | 3.13  | 4.65 | 5.69 |
| 1448943_PM_at   | Nrp1                                                                                                                                                             | 5.36 | 6.96  | 4.34 | 5.38 |
| 1422814_PM_at   | Aspm                                                                                                                                                             | 2.33 | 3.15  | 2.72 | 3.76 |
| 1418346_PM_at   | Insl6                                                                                                                                                            | 6.56 | 6.86  | 6.46 | 7.50 |
| 1451611_PM_at   | Pla2g16                                                                                                                                                          | 7.62 | 8.62  | 6.37 | 7.41 |
| 1435659_PM_a_at | Tpi1                                                                                                                                                             | 6.79 | 7.16  | 5.47 | 6.51 |

|                 |                                                                                                                                 |      |      |      |       |
|-----------------|---------------------------------------------------------------------------------------------------------------------------------|------|------|------|-------|
| 1426665_PM_at   | Katnb1                                                                                                                          | 5.78 | 6.41 | 4.98 | 6.02  |
| 1450626_PM_at   | Manba                                                                                                                           | 6.93 | 7.66 | 5.51 | 6.55  |
| 1445597_PM_s_at | Pla2g16                                                                                                                         | 8.84 | 9.67 | 7.58 | 8.62  |
| 1444152_PM_at   | Cugbp2                                                                                                                          | 7.06 | 7.40 | 5.67 | 6.71  |
| 1455065_PM_x_at | Gnpda1                                                                                                                          | 7.73 | 8.77 | 6.62 | 7.66  |
| 1435517_PM_x_at | Ralb                                                                                                                            | 4.87 | 5.54 | 4.05 | 5.08  |
| 1451776_PM_s_at | Hopx                                                                                                                            | 6.40 | 6.79 | 5.03 | 6.06  |
| 1424724_PM_a_at | D16Ertd472e                                                                                                                     | 7.41 | 7.47 | 7.11 | 8.14  |
| 1416343_PM_a_at | Lamp2                                                                                                                           | 5.12 | 6.69 | 7.19 | 8.22  |
| 1441164_PM_at   | ---                                                                                                                             | 2.77 | 3.55 | 2.80 | 3.83  |
| 1457944_PM_at   | ---                                                                                                                             | 6.46 | 6.61 | 7.05 | 8.08  |
| 1424050_PM_s_at | Fgfr1                                                                                                                           | 3.89 | 4.19 | 3.42 | 4.45  |
| 1449109_PM_at   | Socs2                                                                                                                           | 3.98 | 4.21 | 4.27 | 5.29  |
| 1435028_PM_at   | Wdr7                                                                                                                            | 6.69 | 7.26 | 5.08 | 6.11  |
| 1423717_PM_at   | Ak3                                                                                                                             | 6.87 | 7.13 | 5.43 | 6.46  |
| 1417458_PM_s_at | Cks2                                                                                                                            | 6.97 | 8.30 | 9.82 | 10.85 |
| 1416344_PM_at   | Lamp2                                                                                                                           | 6.83 | 8.02 | 8.72 | 9.75  |
| 1452540_PM_a_at | <small>Hist1h2bc /// Hist1h2be /// Hist1h2b /// Hist1h2bm /// Hist1h2bp /// LOC100046213 /// LOC656522 /// RP23-38E20.1</small> | 7.20 | 7.11 | 7.74 | 8.76  |
| 1420980_PM_at   | Pak1                                                                                                                            | 4.24 | 4.32 | 3.95 | 4.97  |
| 1450790_PM_at   | Tg                                                                                                                              | 2.59 | 2.32 | 2.98 | 4.00  |
| 1417491_PM_at   | Ctsb                                                                                                                            | 4.66 | 5.15 | 4.96 | 5.98  |
| 1420805_PM_at   | Myl10                                                                                                                           | 4.50 | 6.84 | 3.52 | 4.54  |
| 1434537_PM_at   | Slco3a1                                                                                                                         | 7.08 | 7.32 | 6.00 | 7.02  |
| 1425684_PM_at   | Akr1b10                                                                                                                         | 6.26 | 6.51 | 5.41 | 6.42  |
| 1428027_PM_at   | ---                                                                                                                             | 2.71 | 2.75 | 5.99 | 7.00  |
| 1438910_PM_a_at | Stom                                                                                                                            | 3.79 | 3.87 | 3.83 | 4.84  |
| 1428562_PM_at   | 2210403K04Rik                                                                                                                   | 3.74 | 5.07 | 7.00 | 8.01  |
| 1450272_PM_at   | Tnfsf8                                                                                                                          | 7.53 | 7.58 | 6.78 | 7.78  |
| 1452927_PM_x_at | Tpi1                                                                                                                            | 7.53 | 7.86 | 6.28 | 7.29  |
| 1430985_PM_at   | 1810027O10Rik                                                                                                                   | 7.30 | 8.64 | 6.22 | 7.23  |
| 1418084_PM_at   | Nrp1                                                                                                                            | 4.66 | 6.15 | 3.81 | 4.81  |
| 1421529_PM_a_at | Txnrd1                                                                                                                          | 7.74 | 7.95 | 7.30 | 8.30  |
| 1416619_PM_at   | 4632428N05Rik                                                                                                                   | 9.77 | 9.25 | 8.97 | 7.97  |
| 1441415_PM_at   | ---                                                                                                                             | 6.34 | 6.03 | 7.28 | 6.28  |
| 1436735_PM_at   | Nsun3                                                                                                                           | 5.67 | 5.60 | 5.52 | 4.51  |
| 1434353_PM_at   | Sfmbt2                                                                                                                          | 7.15 | 6.03 | 5.00 | 4.00  |
| 1445103_PM_at   | ---                                                                                                                             | 2.89 | 2.91 | 3.77 | 2.75  |
| 1425532_PM_a_at | Bin1                                                                                                                            | 7.74 | 7.38 | 6.76 | 5.74  |
| 1428288_PM_at   | Klf9                                                                                                                            | 4.92 | 4.64 | 6.13 | 5.11  |
| 1423389_PM_at   | Smad7                                                                                                                           | 9.29 | 8.75 | 9.08 | 8.05  |
| 1444299_PM_at   | A430093F15Rik                                                                                                                   | 7.92 | 8.05 | 7.15 | 6.11  |
| 1423161_PM_s_at | Spred1                                                                                                                          | 3.04 | 2.72 | 4.29 | 3.26  |
| 1451899_PM_a_at | Gtf2ird1                                                                                                                        | 6.43 | 5.23 | 6.34 | 5.30  |
| 1456851_PM_at   | ---                                                                                                                             | 7.96 | 7.39 | 7.23 | 6.19  |
| 1448960_PM_at   | Cxhc5                                                                                                                           | 5.01 | 4.54 | 6.90 | 5.86  |
| 1417522_PM_at   | Fbxo32                                                                                                                          | 5.92 | 5.23 | 5.04 | 3.99  |
| 1455252_PM_at   | Tsc1                                                                                                                            | 7.43 | 6.62 | 7.55 | 6.49  |

|                 |                                                                                                                                          |       |      |       |      |
|-----------------|------------------------------------------------------------------------------------------------------------------------------------------|-------|------|-------|------|
| 1420754_PM_at   | Ttf1                                                                                                                                     | 7.44  | 6.50 | 7.29  | 6.24 |
| 1455220_PM_at   | Frat2                                                                                                                                    | 8.48  | 7.65 | 8.57  | 7.51 |
| 1449520_PM_at   | Ttc28                                                                                                                                    | 7.66  | 6.81 | 7.48  | 6.41 |
| 1428122_PM_s_at | Fam125b                                                                                                                                  | 6.44  | 5.14 | 5.29  | 4.22 |
| 1439141_PM_at   | Gpr18                                                                                                                                    | 9.36  | 8.39 | 9.40  | 8.33 |
| 1436892_PM_at   | Spred2                                                                                                                                   | 5.76  | 5.24 | 7.12  | 6.04 |
| 1416107_PM_at   | Nsg2                                                                                                                                     | 10.43 | 9.74 | 7.51  | 6.43 |
| 1451763_PM_at   | Cnga1                                                                                                                                    | 5.98  | 5.46 | 4.56  | 3.47 |
| 1436329_PM_at   | Egr3                                                                                                                                     | 7.90  | 7.66 | 9.68  | 8.59 |
| 1423059_PM_at   | Ptk2                                                                                                                                     | 4.86  | 3.69 | 4.59  | 3.50 |
| 1429491_PM_s_at | Rif1                                                                                                                                     | 8.62  | 7.68 | 8.46  | 7.37 |
| 1440952_PM_at   | ---                                                                                                                                      | 8.49  | 7.80 | 7.59  | 6.48 |
| 1424838_PM_at   | A330049M08Rik                                                                                                                            | 5.68  | 6.14 | 6.28  | 5.17 |
| 1434027_PM_at   | Rcan3                                                                                                                                    | 7.41  | 7.45 | 8.40  | 7.28 |
| 1460242_PM_at   | Cd55                                                                                                                                     | 7.94  | 7.97 | 6.79  | 5.67 |
| 1423162_PM_s_at | Spred1                                                                                                                                   | 3.99  | 3.09 | 5.53  | 4.41 |
| 1434581_PM_at   | 2410066E13Rik                                                                                                                            | 6.54  | 5.71 | 6.00  | 4.88 |
| 1438823_PM_at   | ---                                                                                                                                      | 3.96  | 3.61 | 6.28  | 5.15 |
| 1437584_PM_at   | ---                                                                                                                                      | 10.04 | 9.59 | 9.47  | 8.34 |
| 1427766_PM_at   | <small>A130082M07Rik /// EG667677 /// ENMUSG00000076763 /// ENMUSG00000076765 /// Gm11046 /// LOC100444026 /// LOC677567 /// Tc4</small> | 7.23  | 7.17 | 6.76  | 5.62 |
| 1435545_PM_at   | BC032203                                                                                                                                 | 7.59  | 6.59 | 5.58  | 4.43 |
| 1426147_PM_s_at | Cldn10                                                                                                                                   | 5.23  | 4.93 | 4.85  | 3.70 |
| 1438712_PM_at   | Dennd2d                                                                                                                                  | 7.61  | 7.17 | 6.35  | 5.20 |
| 1443553_PM_at   | ---                                                                                                                                      | 3.75  | 3.47 | 5.75  | 4.57 |
| 1448328_PM_at   | Sh3bp2                                                                                                                                   | 5.43  | 5.71 | 7.24  | 6.06 |
| 1434891_PM_at   | Ptgfrn                                                                                                                                   | 5.62  | 3.90 | 4.69  | 3.51 |
| 1460188_PM_at   | Ptpn6                                                                                                                                    | 9.67  | 9.65 | 8.57  | 7.38 |
| 1450450_PM_at   | Rcan3                                                                                                                                    | 5.87  | 6.00 | 6.75  | 5.56 |
| 1457549_PM_at   | ---                                                                                                                                      | 8.32  | 7.88 | 8.06  | 6.86 |
| 1460116_PM_s_at | Spred1                                                                                                                                   | 2.30  | 2.14 | 3.51  | 2.29 |
| 1436499_PM_at   | Sgms1                                                                                                                                    | 8.87  | 8.76 | 8.13  | 6.90 |
| 1418762_PM_at   | Cd55                                                                                                                                     | 8.21  | 7.96 | 7.75  | 6.52 |
| 1418836_PM_at   | Qprt                                                                                                                                     | 6.49  | 6.10 | 6.63  | 5.40 |
| 1424032_PM_at   | Hvcn1                                                                                                                                    | 9.01  | 9.12 | 7.02  | 5.78 |
| 1438805_PM_at   | Ccnd3                                                                                                                                    | 8.72  | 8.37 | 8.67  | 7.42 |
| 1421594_PM_a_at | Sytl2                                                                                                                                    | 6.87  | 6.07 | 5.34  | 4.09 |
| 1454967_PM_at   | ---                                                                                                                                      | 7.14  | 6.67 | 8.15  | 6.89 |
| 1426576_PM_at   | Sgms1                                                                                                                                    | 7.12  | 6.88 | 6.41  | 5.14 |
| 1437390_PM_x_at | Stx1a                                                                                                                                    | 7.77  | 6.86 | 8.18  | 6.91 |
| 1454745_PM_at   | Arhgap29                                                                                                                                 | 7.10  | 6.59 | 6.93  | 5.66 |
| 1435265_PM_at   | ---                                                                                                                                      | 5.39  | 4.85 | 5.99  | 4.72 |
| 1446567_PM_at   | ---                                                                                                                                      | 7.91  | 7.36 | 7.48  | 6.20 |
| 1428682_PM_at   | Zc3h6                                                                                                                                    | 6.77  | 6.31 | 5.55  | 4.25 |
| 1442437_PM_at   | ---                                                                                                                                      | 5.87  | 5.25 | 5.37  | 4.07 |
| 1423571_PM_at   | S1pr1                                                                                                                                    | 10.22 | 9.83 | 10.09 | 8.79 |
| 1458802_PM_at   | Hivep3                                                                                                                                   | 7.25  | 7.33 | 9.45  | 8.13 |
| 1418989_PM_at   | Ctse                                                                                                                                     | 7.93  | 6.92 | 6.47  | 5.14 |

|                 |               |       |       |       |      |
|-----------------|---------------|-------|-------|-------|------|
| 1423756_PM_s_at | Igfbp4        | 10.70 | 8.19  | 6.03  | 4.69 |
| 1448458_PM_at   | Top2b         | 5.12  | 4.92  | 5.31  | 3.97 |
| 1454646_PM_at   | Tcp11l2       | 8.79  | 8.40  | 8.53  | 7.15 |
| 1441286_PM_at   | Gm13948       | 5.77  | 5.86  | 5.46  | 4.06 |
| 1419136_PM_at   | Akr1c18       | 3.24  | 2.83  | 4.33  | 2.92 |
| 1434403_PM_at   | Spred2        | 7.35  | 6.71  | 8.58  | 7.11 |
| 1423689_PM_a_at | Gpsm1         | 4.17  | 2.58  | 5.10  | 3.63 |
| 1448747_PM_at   | Fbxo32        | 8.05  | 7.26  | 7.67  | 6.18 |
| 1448576_PM_at   | Il7r          | 9.79  | 9.64  | 9.65  | 8.14 |
| 1451516_PM_at   | Rhebl1        | 6.48  | 5.39  | 5.86  | 4.36 |
| 1436491_PM_at   | Gm11346       | 9.57  | 9.11  | 8.17  | 6.67 |
| 1456509_PM_at   | 1110032F04Rik | 4.81  | 3.79  | 4.65  | 3.11 |
| 1416630_PM_at   | Id3           | 7.84  | 7.57  | 7.04  | 5.41 |
| 1421840_PM_at   | Abca1         | 7.35  | 5.74  | 6.35  | 4.70 |
| 1448575_PM_at   | Il7r          | 11.65 | 11.47 | 11.51 | 9.86 |
| 1417930_PM_at   | Nab2          | 6.77  | 6.58  | 7.34  | 5.69 |
| 1433977_PM_at   | Hs3st3b1      | 7.07  | 5.92  | 6.94  | 5.19 |
| 1436585_PM_at   | BB182297      | 5.88  | 4.42  | 6.34  | 4.37 |
